# Supplementary material for: DNA methylation mediates the association between breastfeeding and early-life growth trajectories
Source: PubMed Central journal article supplement (PMC8697471; doi:10.1186/s13148-021-01209-z), 2021-12-22

**Supplementary Table 1: Top EWAS hits from ALSPAC data in girls selected at the  $P=1.10^{-4}$  level.**

| CpG site       | Gene                  | Chr | Pos.    | Group           | <i>GWAS</i><br><i>SNP</i>            | <i>P</i> | <i>P</i> <sub>adj</sub> <sup>†</sup> | EBF effect on DNAm<br>(≥3 months vs. 0) <sup>#</sup> |            |            |             | EBF direct effect on BMI<br>(≥3 months vs. 0) <sup>§</sup> |            |            |             | EBF effect on BMI mediated<br>by DNAm<br>(≥3 months vs. 0) <sup>&amp;</sup> |            |            |             |
|----------------|-----------------------|-----|---------|-----------------|--------------------------------------|----------|--------------------------------------|------------------------------------------------------|------------|------------|-------------|------------------------------------------------------------|------------|------------|-------------|-----------------------------------------------------------------------------|------------|------------|-------------|
|                |                       |     |         |                 |                                      |          |                                      | 1<br>year                                            | 2<br>years | 7<br>years | 15<br>years | 1<br>year                                                  | 2<br>years | 7<br>years | 15<br>years | 1<br>year                                                                   | 2<br>years | 7<br>years | 15<br>years |
| cg06471491     | miR-21                | 17  | 57,918  | TSS1500         | N                                    | <E-16    | <E-16                                | 0.02                                                 | -0.08      | -0.07      | -0.07       | -1.13                                                      | -0.51      | -0.17      | -0.37       | 0.36                                                                        | 0.11       | 0.00       | 0.01        |
| cg16645539     | SNAPC3                | 9   | 15,423  | TSS200          | rs62571018<br>BMI                    | <E-16    | <E-16                                | -0.05                                                | -0.03      | 0.00       | -0.01       | -0.28                                                      | -0.73      | -0.21      | -0.29       | -0.38                                                                       | 0.00       | 0.02       | 0.00        |
| cg07408552     | ATP6V0A1              | 17  | 40,612  | 5'UTR           | rs11079041<br>Waist-hip ratio        | 3.E-08   | 2.E-08                               | -0.19                                                | -0.18      | 0.06       | 0.00        | -1.84                                                      | -0.44      | -0.16      | -0.32       | -0.34                                                                       | -0.08      | 0.03       | -0.01       |
| cg08224066     | DHX15/<br>PPARGC1A    | 4   | 24,578  | Body            | N                                    | 4.E-08   | 2.E-08                               | -0.04                                                | 0.03       | 0.05       | 0.05        | -0.30                                                      | -0.44      | -0.20      | -0.30       | 0.00                                                                        | 0.03       | 0.00       | 0.02        |
| cg14822546     | LINC00398/<br>ALOX5AP | 13  | 31,381  |                 | N                                    | 7.E-08   | 8.E-08                               | -0.01                                                | 0.01       | 0.01       | -0.01       | -0.76                                                      | -0.53      | -0.22      | -0.40       | 0.09                                                                        | -0.04      | 0.01       | 0.00        |
| cg14776321     | ANKRD26               | 10  | 27,220  | Body            | rs7081476<br>BMI                     | 7.E-08   | 2.E-07                               | -0.05                                                | -0.01      | 0.04       | 0.04        | -0.10                                                      | -0.43      | -0.12      | -0.30       | -0.30                                                                       | 0.03       | 0.06       | 0.02        |
| ch.8.18261148F | NATP/NAT2             | 8   | 18,217  |                 | rs4921913<br>Metabolic<br>syndrome   | 7.E-08   | 1.E-07                               | -0.11                                                | -0.06      | -0.03      | -0.04       | -0.66                                                      | -0.67      | -0.19      | -0.26       | 0.05                                                                        | 0.01       | 0.00       | 0.01        |
| cg00313685     | CUX1                  | 7   | 101,469 | Body            | rs367026<br>Waist-hip ratio          | 2.E-07   | 2.E-07                               | 0.19                                                 | 0.06       | -0.01      | 0.05        | -0.39                                                      | -0.14      | -0.22      | -0.30       | -0.10                                                                       | 0.00       | -0.02      | -0.04       |
| cg17476951     | TRAPPC9               | 8   | 141,054 | Body            | rs71514664<br>Hip circum<br>ference  | 2.E-07   | 6.E-07                               | -0.12                                                | -0.06      | 0.02       | 0.01        | -0.67                                                      | -0.53      | -0.25      | -0.30       | 0.13                                                                        | 0.20       | 0.01       | 0.00        |
| cg26398656     | OSBPL1A               | 18  | 21,852  | Body;<br>TSS200 | rs275856<br>Type 2<br>diabetes       | 3.E-07   | 5.E-07                               | -0.11                                                | -0.06      | 0.00       | 0.04        | -0.36                                                      | -0.60      | -0.23      | -0.25       | -0.27                                                                       | -0.11      | 0.03       | -0.01       |
| cg26872564     | ZNF185                | X   | 152,087 | Body            | N                                    | 3.E-07   | 2.E-06                               | -0.06                                                | -0.01      | 0.06       | 0.07        | -0.27                                                      | -0.19      | -0.23      | -0.38       | 0.04                                                                        | 0.01       | 0.00       | -0.01       |
| cg18176842     | NSE1                  | 2   | 14,776  | 3'UTR           | rs7602441<br>BMI                     | 3.E-07   | 4.E-07                               | -0.11                                                | -0.09      | -0.02      | -0.06       | -0.17                                                      | -0.03      | -0.27      | -0.41       | 0.10                                                                        | 0.08       | 0.00       | -0.03       |
| cg04354689     | PDPK1                 | 16  | 2,661   | Body            | N                                    | 5.E-07   | 6.E-07                               | 0.19                                                 | 0.06       | -0.01      | 0.05        | -0.39                                                      | -0.14      | -0.22      | -0.30       | 0.14                                                                        | 0.02       | -0.02      | 0.00        |
| cg03664802     | EPC2                  | 2   | 149,402 | TSS200          | rs1234423<br>Body height             | 5.E-07   | 5.E-07                               | 0.05                                                 | 0.00       | -0.01      | -0.04       | -0.71                                                      | -0.37      | -0.24      | -0.34       | -0.01                                                                       | 0.04       | 0.01       | 0.00        |
| cg04781580     | TRAV14DV4             | 14  | 22,393  |                 | N                                    | 6.E-07   | 3.E-07                               | -0.01                                                | 0.03       | -0.02      | -0.02       | -0.31                                                      | -0.42      | -0.22      | -0.38       | 0.11                                                                        | -0.01      | 0.03       | 0.06        |
| cg11746359     | MAML3                 | 4   | 141,012 | Body            | rs2667360<br>BMI                     | 6.E-07   | 4.E-07                               | -0.21                                                | -0.11      | 0.01       | -0.03       | -0.52                                                      | -0.33      | -0.22      | -0.40       | -0.09                                                                       | 0.02       | 0.01       | 0.01        |
| cg27215185     | GMDS                  | 6   | 2,198   | Body            | rs143303199<br>Body height           | 1.E-06   | 2.E-06                               | -0.11                                                | -0.06      | 0.00       | 0.04        | -0.36                                                      | -0.60      | -0.23      | -0.25       | -0.21                                                                       | 0.13       | -0.01      | 0.00        |
| cg23057721     | LINC02594             | 17  | 41,791  |                 | N                                    | 1.E-06   | 2.E-06                               | -0.10                                                | -0.04      | 0.04       | -0.01       | -0.61                                                      | -0.05      | -0.31      | -0.47       | -0.09                                                                       | 0.07       | 0.02       | 0.02        |
| cg04738270     | ACTR1A                | 10  | 104,262 | Body            | rs3862030<br>Waist cir<br>cumference | 2.E-06   | 3.E-06                               | 0.05                                                 | 0.04       | 0.01       | 0.07        | -0.71                                                      | -0.37      | -0.27      | -0.46       | -0.53                                                                       | -0.14      | 0.02       | -0.01       |
| cg09029192     | TNRC6C                | 17  | 76,015  | 5'UTR           | rs1656794<br>Body height             | 2.E-06   | 3.E-06                               | -0.05                                                | -0.01      | 0.04       | 0.04        | -0.10                                                      | -0.43      | -0.12      | -0.30       | -0.05                                                                       | 0.00       | 0.00       | -0.01       |
| cg11566521     | RAPGEF2               | 4   | 160,128 |                 | rs563875<br>Body height              | 2.E-06   | 7.E-07                               | -0.04                                                | 0.03       | 0.05       | 0.05        | -0.30                                                      | -0.44      | -0.20      | -0.30       | 0.02                                                                        | 0.06       | -0.01      | -0.04       |
| cg00524694     | PROP1                 | 5   | 177,388 |                 | rs6601211<br>Body height             | 3.E-06   | 3.E-06                               | -0.19                                                | -0.18      | 0.06       | 0.00        | -1.84                                                      | -0.44      | -0.16      | -0.32       | -0.02                                                                       | 0.00       | 0.01       | 0.00        |
| cg00070899     | GRM4                  | 6   | 34,024  | Body            | rs1759645<br>Body height             | 3.E-06   | 3.E-06                               | -0.21                                                | -0.11      | 0.01       | -0.03       | -0.52                                                      | -0.33      | -0.22      | -0.40       | 0.17                                                                        | 0.06       | 0.00       | -0.02       |
| cg23027583     | HLX                   | 1   | 221,053 | TSS200          | rs10218741                           | 3.E-06   | 5.E-06                               | 0.05                                                 | 0.04       | 0.01       | 0.07        | -0.71                                                      | -0.37      | -0.27      | -0.46       | 0.01                                                                        | -0.02      | 0.01       | 0.00        |

|            |                   |    |         |                  |                                        |        |        |       |       |       |       |       |       |       |       |       |       |       |       |
|------------|-------------------|----|---------|------------------|----------------------------------------|--------|--------|-------|-------|-------|-------|-------|-------|-------|-------|-------|-------|-------|-------|
| cg05241732 | MYH6/<br>miR-208A | 14 | 23,859  | Body;<br>TSS1500 | Body height<br>rs2231301               | 3.E-06 | 1.E-05 | -0.20 | -0.12 | 0.03  | 0.00  | -0.28 | -0.22 | -0.26 | -0.39 | -0.04 | -0.02 | -0.01 | 0.01  |
| cg26992566 | EMC8              | 16 | 85,814  | Body             | N                                      | 5.E-06 | 5.E-05 | -0.12 | -0.06 | 0.02  | 0.01  | -0.67 | -0.53 | -0.25 | -0.30 | -0.06 | -0.04 | 0.01  | 0.01  |
| cg23543615 | MEF2B             | 19 | 19,281  | Body;<br>5'UTR   | rs11670016<br>waist-hip ratio          | 5.E-06 | 9.E-06 | -0.02 | -0.02 | 0.01  | -0.02 | -0.40 | -0.59 | -0.20 | -0.30 | -0.15 | -0.04 | 0.01  | 0.00  |
| cg01505676 | TGM7              | 15 | 43,595  | TSS1500          | N                                      | 6.E-06 | 8.E-06 | -0.07 | -0.03 | 0.00  | 0.02  | -0.29 | -0.45 | -0.16 | -0.30 | -0.23 | -0.06 | 0.02  | 0.00  |
| cg17862404 | TSC22D1           | 13 | 45,009  | Body             | rs10507524<br>waist-hip ratio          | 7.E-06 | 9.E-06 | 0.07  | 0.07  | 0.05  | 0.00  | -0.35 | -0.27 | -0.20 | -0.27 | -0.59 | -0.12 | 0.05  | 0.01  |
| cg06683602 | CXCR1             | 2  | 219,032 | TSS1500          | N                                      | 7.E-06 | 2.E-05 | -0.20 | -0.12 | 0.03  | 0.00  | -0.28 | -0.22 | -0.26 | -0.39 | -0.88 | -0.51 | -0.05 | 0.00  |
| cg23662178 | ZNF518A           | 10 | 97,884  |                  | rs1172955<br>Body height               | 7.E-06 | 7.E-06 | -0.03 | -0.01 | 0.02  | 0.02  | -0.46 | -0.16 | -0.25 | -0.47 | 0.15  | 0.12  | -0.01 | 0.01  |
| cg21966975 | PADI3             | 1  | 17,575  | TSS200           | rs2284746<br>Body height               | 8.E-06 | 6.E-06 | -0.01 | 0.03  | -0.02 | -0.02 | -0.31 | -0.42 | -0.22 | -0.38 | -0.20 | -0.05 | 0.03  | -0.14 |
| cg22851175 | DDX11             | 12 | 31,274  |                  | rs3214606<br>Type 2 diabetes           | 9.E-06 | 2.E-05 | 0.15  | 0.05  | -0.09 | -0.06 | -0.52 | 0.12  | -0.24 | -0.35 | -0.49 | -0.19 | -0.01 | 0.08  |
| cg14531663 | PRRT1             | 6  | 32,117  | 3'UTR            | rs2857693<br>Body height               | 1.E-05 | 6.E-06 | -0.19 | -0.18 | 0.06  | 0.00  | -1.84 | -0.44 | -0.16 | -0.32 | -0.29 | 0.24  | 0.03  | 0.00  |
| cg10053073 | RECQL5            | 17 | 73,623  | 3'UTR            | rs2385263<br>Waist-hip ratio           | 1.E-05 | 3.E-05 | 0.07  | 0.07  | 0.05  | 0.00  | -0.35 | -0.27 | -0.20 | -0.27 | -0.02 | -0.01 | 0.00  | -0.04 |
| cg07548512 | SDF4              | 1  | 1,155   | Body             | rs1240697<br>Body height               | 1.E-05 | 1.E-05 | -0.15 | -0.07 | 0.03  | 0.02  | -0.29 | -0.41 | -0.17 | -0.32 | 0.22  | 0.01  | -0.01 | -0.01 |
| cg17401282 | GABRG2            | 5  | 161,494 | TSS1500          | N                                      | 1.E-05 | 4.E-05 | -0.05 | -0.03 | 0.00  | -0.01 | -0.28 | -0.73 | -0.21 | -0.29 | 0.18  | 0.21  | -0.01 | -0.04 |
| cg12510087 | GALNT9            | 12 | 132,887 | Body             | rs11247009<br>BMI                      | 1.E-05 | 8.E-05 | -0.06 | -0.01 | 0.06  | 0.07  | -0.27 | -0.19 | -0.23 | -0.38 | -0.10 | -0.10 | -0.02 | 0.16  |
| cg10082165 | CTSG              | 14 | 25,044  | Body             | N                                      | 2.E-05 | 2.E-05 | -0.11 | -0.04 | 0.04  | -0.05 | -0.28 | 0.05  | -0.16 | -0.33 | -0.01 | 0.00  | 0.01  | -0.03 |
| cg06340161 | GPT2              | 16 | 46,963  | 3'UTR            | N                                      | 2.E-05 | 5.E-05 | 0.00  | 0.05  | 0.05  | -0.01 | 0.40  | -0.07 | -0.24 | -0.57 | -0.06 | 0.02  | 0.01  | -0.03 |
| cg12251803 | LRRFIP1           | 2  | 238,640 | Body             | rs11680012<br>obesity                  | 2.E-05 | 3.E-05 | -0.34 | -0.23 | -0.04 | -0.12 | -0.27 | -0.27 | -0.21 | -0.40 | -0.18 | -0.26 | -0.03 | 0.00  |
| cg22334632 | TMEM160           | 19 | 47,553  | TSS1500          | rs112551143<br>BMI                     | 2.E-05 | 3.E-04 | 0.00  | 0.05  | 0.05  | -0.01 | 0.40  | -0.07 | -0.24 | -0.57 | 0.00  | 0.05  | 0.04  | 0.01  |
| cg09560549 | SPG7              | 16 | 89,573  | TSS1500          | rs4785574<br>Body height               | 2.E-05 | 6.E-05 | -0.01 | 0.00  | -0.01 | -0.01 | -0.79 | -0.72 | -0.21 | -0.35 | 0.03  | -0.18 | 0.00  | -0.01 |
| cg04516203 | N/A               | 16 | 51,443  |                  | N                                      | 2.E-05 | 2.E-05 | 0.14  | 0.00  | -0.07 | -0.07 | -0.97 | -0.36 | -0.19 | -0.37 | -0.12 | -0.18 | 0.00  | 0.00  |
| cg03553386 | IGF2;INS-IGF2     | 11 | 2,171   | TSS200;<br>Body  | rs217227<br>Body height                | 2.E-05 | 8.E-05 | -0.10 | -0.04 | 0.04  | -0.01 | -0.61 | -0.05 | -0.31 | -0.47 | -0.65 | -0.21 | -0.02 | 0.02  |
| cg14086922 | MICAL3            | 22 | 18,268  |                  | rs10854521<br>Body height              | 2.E-05 | 3.E-05 | -0.04 | -0.02 | -0.01 | 0.01  | -0.78 | -0.89 | -0.21 | -0.28 | -0.09 | -0.18 | -0.04 | 0.09  |
| cg19497523 | TMPRSS9           | 19 | 2,425   | Body             | N                                      | 3.E-05 | 8.E-06 | -0.04 | -0.02 | -0.01 | 0.01  | -0.78 | -0.89 | -0.21 | -0.28 | 0.13  | 0.10  | 0.00  | 0.04  |
| cg03409272 | CCL14-CCL15       | 17 | 34,330  | TSS1500          | N                                      | 3.E-05 | 3.E-05 | -0.21 | -0.11 | 0.01  | -0.03 | -0.52 | -0.33 | -0.22 | -0.40 | -1.49 | -0.52 | 0.02  | 0.04  |
| cg02822745 | DKK2              | 4  | 108,271 |                  | N                                      | 3.E-05 | 3.E-05 | -0.01 | 0.00  | -0.01 | -0.01 | -0.79 | -0.72 | -0.21 | -0.35 | 0.75  | 0.37  | 0.00  | -0.06 |
| cg16004911 | FRYL              | 4  | 48,783  | TSS1500          | rs10031777<br>Body height              | 3.E-05 | 5.E-05 | 0.02  | -0.08 | -0.07 | -0.07 | -1.13 | -0.51 | -0.17 | -0.37 | 0.08  | 0.00  | 0.00  | 0.03  |
| cg07988060 | UTP6              | 17 | 30,235  |                  | rs7209766<br>Body height               | 3.E-05 | 2.E-05 | -0.05 | -0.03 | 0.00  | -0.01 | -0.28 | -0.73 | -0.21 | -0.29 | -0.01 | 0.06  | 0.01  | -0.01 |
| cg23000550 | P2RX6             | 22 | 21,369  | TSS1500          | N                                      | 3.E-05 | 9.E-05 | -0.16 | -0.06 | 0.05  | -0.12 | -0.46 | 0.07  | -0.40 | -0.54 | -0.44 | -0.30 | 0.01  | 0.00  |
| cg15921911 | RAD51B            | 14 | 69,156  |                  | rs11158743<br>Body height              | 3.E-05 | 7.E-05 | -0.34 | -0.23 | -0.04 | -0.12 | -0.27 | -0.27 | -0.21 | -0.40 | -0.62 | -0.64 | 0.01  | -0.06 |
| cg15243597 | WDPCP             | 2  | 63,553  | Body             | rs775417095<br>Waist cir<br>cumference | 3.E-05 | 4.E-05 | -0.07 | -0.03 | 0.00  | 0.02  | -0.29 | -0.45 | -0.16 | -0.30 | 0.11  | 0.17  | 0.01  | 0.00  |
| cg07364240 | NRROS             | 3  | 196,389 | 3'UTR            | N                                      | 4.E-05 | 2.E-05 | -0.15 | -0.07 | 0.03  | 0.02  | -0.29 | -0.41 | -0.17 | -0.32 | -0.12 | -0.03 | 0.01  | -0.08 |
| cg07012178 | PRKAG2            | 7  | 151,305 | Body             | N                                      | 4.E-05 | 5.E-05 | 0.00  | 0.05  | 0.05  | -0.01 | 0.40  | -0.07 | -0.24 | -0.57 | -0.07 | -0.13 | 0.01  | -0.08 |
| cg10883421 | RMND1/            | 6  | 151,773 | TSS200           | rs9397403                              | 4.E-05 | 2.E-05 | 0.02  | -0.08 | -0.07 | -0.07 | -1.13 | -0.51 | -0.17 | -0.37 | -0.55 | 0.14  | 0.06  | -0.04 |

|            |                    |    |         |                   |                                       |        |        |       |       |       |       |       |       |       |       |       |       |       |       |
|------------|--------------------|----|---------|-------------------|---------------------------------------|--------|--------|-------|-------|-------|-------|-------|-------|-------|-------|-------|-------|-------|-------|
|            | ARMT1              |    |         |                   | Body height                           |        |        |       |       |       |       |       |       |       |       |       |       |       |       |
| cg06527213 | KLHL25/<br>MIR1276 | 15 | 86,315  | 5'UTR;<br>TSS1500 | rs10520587<br>Body height             | 4.E-05 | 7.E-05 | -0.04 | -0.03 | -0.05 | -0.05 | -0.92 | -1.03 | -0.22 | -0.31 | -0.13 | -0.03 | -0.02 | -0.09 |
| cg02754470 | RNF111             | 15 | 59,158  |                   | N                                     | 4.E-05 | 9.E-05 | -0.11 | -0.09 | -0.02 | -0.06 | -0.17 | -0.03 | -0.27 | -0.41 | -0.05 | -0.04 | 0.01  | -0.03 |
| cg26144456 | NXT2               | X  | 108,779 | TSS200            | N                                     | 4.E-05 | 2.E-05 | -0.04 | -0.03 | -0.05 | -0.05 | -0.92 | -1.03 | -0.22 | -0.31 | 0.15  | 0.07  | 0.01  | 0.02  |
| cg09699373 | USP10              | 16 | 84,823  |                   | rs2326458<br>Body height              | 4.E-05 | 5.E-05 | -0.04 | 0.03  | 0.05  | 0.05  | -0.30 | -0.44 | -0.20 | -0.30 | -0.10 | -0.01 | 0.04  | 0.03  |
| cg00469800 | TOR1A              | 9  | 132,585 | Body              | N                                     | 5.E-05 | 9.E-05 | -0.04 | -0.02 | -0.01 | 0.01  | -0.78 | -0.89 | -0.21 | -0.28 | -0.33 | -0.19 | -0.01 | 0.01  |
| cg17901584 | DHCR24             | 1  | 55,354  | TSS1500           | rs597021<br>Body height               | 5.E-05 | 1.E-04 | -0.31 | -0.20 | -0.02 | -0.05 | -0.74 | -0.30 | -0.30 | -0.47 | 0.07  | 0.03  | -0.01 | 0.01  |
| cg04126095 | MASP1              | 3  | 186,954 | Body              | rs3864095<br>Type 2 diabetes          | 5.E-05 | 9.E-05 | -0.01 | 0.00  | -0.01 | -0.01 | -0.79 | -0.72 | -0.21 | -0.35 | -0.52 | -0.31 | 0.01  | 0.00  |
| cg02612228 | MYOM2              | 8  | 1,983   |                   | N                                     | 5.E-05 | 3.E-04 | -0.01 | 0.01  | 0.01  | -0.01 | -0.76 | -0.53 | -0.22 | -0.40 | 0.41  | 0.06  | -0.02 | 0.03  |
| cg16824319 | LYPD8              | 1  | 248,904 | TSS1500           | N                                     | 5.E-05 | 8.E-05 | 0.02  | 0.02  | 0.00  | 0.01  | -0.64 | -0.41 | -0.29 | -0.49 | -0.02 | 0.03  | 0.00  | -0.05 |
| cg18000306 | DUSP22             | 6  | 289     |                   | N                                     | 5.E-05 | 3.E-05 | -0.11 | -0.04 | 0.04  | -0.05 | -0.28 | 0.05  | -0.16 | -0.33 | 0.29  | 0.25  | 0.00  | 0.11  |
| cg01875529 | ANKRD11            | 16 | 89,355  | Body              | rs57258486<br>Body height             | 5.E-05 | 7.E-05 | -0.15 | -0.07 | 0.03  | 0.02  | -0.29 | -0.41 | -0.17 | -0.32 | -0.41 | -0.14 | 0.06  | 0.06  |
| cg12489353 | EHD2               | 19 | 48,231  | Body              | rs12973221<br>BMI                     | 5.E-05 | 7.E-05 | 0.19  | 0.06  | -0.01 | 0.05  | -0.39 | -0.14 | -0.22 | -0.30 | 0.18  | 0.16  | 0.00  | 0.02  |
| cg02593766 | MYCBPAP/EP<br>N3   | 17 | 48,609  | Body;<br>TSS1500  | N                                     | 5.E-05 | 2.E-04 | -0.34 | -0.23 | -0.04 | -0.12 | -0.27 | -0.27 | -0.21 | -0.40 | 0.08  | 0.02  | -0.03 | 0.00  |
| cg07873325 | KRCC1              | 2  | 88,356  | TSS1500           | N                                     | 5.E-05 | 5.E-04 | -0.02 | -0.02 | 0.01  | -0.02 | -0.40 | -0.59 | -0.20 | -0.30 | -1.19 | -0.55 | 0.00  | -0.04 |
| cg10975863 | RAD51B             | 14 | 68,831  | Body              | rs11158743<br>Body height             | 6.E-05 | 3.E-05 | 0.05  | 0.05  | 0.05  | 0.05  | -0.43 | -0.32 | -0.24 | -0.40 | -0.07 | -0.06 | -0.02 | -0.03 |
| cg21324211 | FSD2               | 15 | 83,419  |                   | N                                     | 6.E-05 | 8.E-05 | -0.11 | -0.06 | 0.00  | 0.04  | -0.36 | -0.60 | -0.23 | -0.25 | -0.36 | 0.03  | 0.03  | -0.01 |
| cg21575634 | STX2               | 12 | 131,310 | Body              | N                                     | 6.E-05 | 2.E-04 | 0.05  | 0.05  | 0.05  | 0.05  | -0.43 | -0.32 | -0.24 | -0.40 | -0.12 | -0.05 | 0.00  | 0.01  |
| cg20817228 | LOC728855          | 1  | 149,615 | Body              | N                                     | 6.E-05 | 6.E-05 | -0.01 | 0.01  | 0.01  | -0.01 | -0.76 | -0.53 | -0.22 | -0.40 | -0.04 | 0.10  | 0.00  | 0.00  |
| cg03112433 | CDK14              | 7  | 90,339  | TSS200            | N                                     | 7.E-05 | 3.E-04 | -0.31 | -0.20 | -0.02 | -0.05 | -0.74 | -0.30 | -0.30 | -0.47 | 0.04  | 0.16  | 0.01  | -0.02 |
| cg03103888 | TMCO3              | 13 | 114,148 | 5'UTR             | N                                     | 7.E-05 | 1.E-04 | -0.31 | -0.20 | -0.02 | -0.05 | -0.74 | -0.30 | -0.30 | -0.47 | -0.09 | 0.00  | 0.02  | -0.05 |
| cg16756527 | RCAN1              | 21 | 35,891  | Body              | N                                     | 7.E-05 | 7.E-05 | -0.11 | -0.06 | -0.03 | -0.04 | -0.66 | -0.67 | -0.19 | -0.26 | 0.06  | -0.06 | -0.01 | 0.02  |
| cg19755813 | GEMIN4             | 17 | 650     | Body              | N                                     | 7.E-05 | 9.E-05 | -0.11 | -0.06 | -0.03 | -0.04 | -0.66 | -0.67 | -0.19 | -0.26 | 0.52  | 0.20  | -0.01 | 0.02  |
| cg02386599 | DAAM2              | 6  | 39,770  | 5'UTR             | rs1928191<br>Body height              | 7.E-05 | 2.E-04 | -0.05 | -0.01 | 0.04  | 0.04  | -0.10 | -0.43 | -0.12 | -0.30 | 0.00  | -0.07 | 0.02  | 0.01  |
| cg14363249 | TMC1               | 9  | 75,214  | 5'UTR             | N                                     | 7.E-05 | 1.E-04 | -0.01 | 0.03  | -0.02 | -0.02 | -0.31 | -0.42 | -0.22 | -0.38 | -0.03 | -0.05 | 0.00  | -0.02 |
| cg03217337 | CHMP4B             | 20 | 32,447  |                   | Rs12625495<br>Body height             | 7.E-05 | 1.E-04 | 0.05  | 0.00  | -0.01 | -0.04 | -0.71 | -0.37 | -0.24 | -0.34 | 0.06  | 0.05  | 0.00  | 0.12  |
| cg10107890 | -                  | 2  | 44,314  |                   | rs4953076<br>Body height              | 7.E-05 | 1.E-04 | 0.14  | 0.00  | -0.07 | -0.07 | -0.97 | -0.36 | -0.19 | -0.37 | -0.04 | -0.04 | -0.02 | -0.03 |
| cg07414571 | ZNF322             | 6  | 26,690  |                   | rs198853<br>Body height               | 7.E-05 | 8.E-05 | 0.07  | 0.07  | 0.05  | 0.00  | -0.35 | -0.27 | -0.20 | -0.27 | -0.16 | 0.23  | 0.10  | -0.10 |
| cg27457201 | RPTOR              | 17 | 78,854  | Body              | rs11150745<br>BMI                     | 8.E-05 | 4.E-04 | 0.05  | 0.04  | 0.01  | 0.07  | -0.71 | -0.37 | -0.27 | -0.46 | 0.02  | -0.07 | 0.01  | -0.01 |
| cg04580750 | LINC02774          | 1  | 244,200 |                   | rs12027747<br>Body height             | 8.E-05 | 1.E-04 | -0.10 | -0.04 | 0.04  | -0.01 | -0.61 | -0.05 | -0.31 | -0.47 | -0.24 | -0.10 | 0.01  | 0.00  |
| cg16678522 | CBFA2T2            | 20 | 32,150  | Body;<br>TSS1500  | rs12625495<br>Body height             | 8.E-05 | 2.E-04 | -0.12 | -0.06 | 0.02  | 0.01  | -0.67 | -0.53 | -0.25 | -0.30 | -0.13 | 0.02  | 0.01  | -0.11 |
| cg25527325 | PLIN5              | 19 | 4,524   | Body              | rs56356382<br>BMI                     | 8.E-05 | 4.E-04 | -0.03 | -0.01 | 0.02  | 0.02  | -0.46 | -0.16 | -0.25 | -0.47 | -0.58 | -0.36 | -0.05 | 0.00  |
| cg08104594 | DRAXIN             | 1  | 11,786  |                   | rs2336030<br>BMI                      | 8.E-05 | 9.E-05 | 0.15  | 0.05  | -0.09 | -0.06 | -0.52 | 0.12  | -0.24 | -0.35 | 0.07  | 0.01  | 0.00  | 0.01  |
| cg24134056 | FLJ12825           | 12 | 54,495  | Body;<br>TSS1500  | Rs12822416<br>Waist cir<br>cumference | 8.E-05 | 7.E-05 | 0.02  | 0.02  | 0.00  | 0.01  | -0.64 | -0.41 | -0.29 | -0.49 | 0.07  | 0.04  | 0.00  | 0.00  |
| cg07658646 | PRR4               | 12 | 11,002  | TSS200;           | N                                     | 8.E-05 | 7.E-05 | -0.16 | -0.06 | 0.05  | -0.12 | -0.46 | 0.07  | -0.40 | -0.54 | 0.06  | 0.06  | 0.00  | 0.06  |

|                   |                      |    |         |                 |                              |        |        |       |       |       |       |       |       |       |       |       |       |       |       |
|-------------------|----------------------|----|---------|-----------------|------------------------------|--------|--------|-------|-------|-------|-------|-------|-------|-------|-------|-------|-------|-------|-------|
| <b>cg14009440</b> | TMEM53               | 1  | 45,139  | Body<br>Body    | Rs781771<br>IL6              | 8.E-05 | 2.E-04 | -0.16 | -0.06 | 0.05  | -0.12 | -0.46 | 0.07  | -0.40 | -0.54 | 0.05  | 0.02  | 0.00  | 0.03  |
| <b>cg04515702</b> | AKR1B10P1            | 10 | 69,510  |                 | rs573819939<br>Body weight   | 8.E-05 | 1.E-04 | -0.02 | -0.02 | 0.01  | -0.02 | -0.40 | -0.59 | -0.20 | -0.30 | 0.06  | 0.11  | 0.00  | -0.04 |
| <b>cg09010699</b> | ACAP2                | 3  | 195,172 |                 | rs149877182<br>Body height   | 8.E-05 | 2.E-04 | 0.14  | 0.00  | -0.07 | -0.07 | -0.97 | -0.36 | -0.19 | -0.37 | 0.10  | 0.13  | -0.04 | -0.01 |
| <b>cg13081568</b> | NKAIN2               | 6  | 125,145 | 3'UTR           | rs1871329<br>BMI             | 9.E-05 | 2.E-04 | 0.02  | 0.02  | 0.00  | 0.01  | -0.64 | -0.41 | -0.29 | -0.49 | 0.00  | -0.02 | -0.01 | -0.06 |
| <b>cg26543333</b> | NFIC                 | 19 | 3,398   | Body            | rs56356382<br>BMI            | 9.E-05 | 2.E-04 | -0.07 | -0.03 | 0.00  | 0.02  | -0.29 | -0.45 | -0.16 | -0.30 | 0.20  | -0.01 | 0.00  | 0.00  |
| <b>cg20946054</b> | DRAXIN               | 1  | 11,762  | 5'UTR           | rs2336030<br>BMI             | 9.E-05 | 7.E-05 | -0.06 | -0.01 | 0.06  | 0.07  | -0.27 | -0.19 | -0.23 | -0.38 | 0.31  | 0.16  | 0.01  | 0.04  |
| <b>cg13931599</b> | CUBNP3/<br>ANKRD54P1 | 10 | 45,650  | TSS200          | N                            | 9.E-05 | 1.E-04 | 0.05  | 0.00  | -0.01 | -0.04 | -0.71 | -0.37 | -0.24 | -0.34 | 0.40  | 0.17  | 0.00  | -0.09 |
| <b>cg22941668</b> | miR-145              | 5  | 148,810 | TSS200;<br>Body | rs783779<br>Body height      | 9.E-05 | 9.E-05 | -0.03 | -0.01 | 0.02  | 0.02  | -0.46 | -0.16 | -0.25 | -0.47 | 0.02  | 0.08  | 0.02  | -0.20 |
| <b>cg20814202</b> | AATK                 | 17 | 79,129  | Body            | rs62073017<br>Body height    | 9.E-05 | 7.E-05 | -0.11 | -0.04 | 0.04  | -0.05 | -0.28 | 0.05  | -0.16 | -0.33 | -0.49 | -0.33 | 0.01  | -0.01 |
| <b>cg24465329</b> | -                    | 2  | 172,453 |                 | rs56228832<br>Lean body mass | 9.E-05 | 6.E-05 | -0.04 | -0.03 | -0.05 | -0.05 | -0.92 | -1.03 | -0.22 | -0.31 | 0.10  | 0.08  | -0.01 | 0.05  |
| <b>cg11211384</b> | -                    | 6  | 142,360 |                 | rs6930558<br>Birth weight    | 9.E-05 | 1.E-04 | 0.15  | 0.05  | -0.09 | -0.06 | -0.52 | 0.12  | -0.24 | -0.35 | 0.06  | 0.01  | 0.04  | 0.03  |
| <b>cg07603794</b> | CLASP1               | 2  | 122,355 | Body            | N                            | 1.E-04 | 8.E-05 | 0.05  | 0.05  | 0.05  | 0.05  | -0.43 | -0.32 | -0.24 | -0.40 | 0.10  | 0.05  | 0.04  | -0.01 |

<sup>†</sup>*P* values adjusted for obesity-related polygenic risk score

<sup>#</sup>Corresponds to estimate of  $\beta_M(t)$  in Figure 1. We estimated the average effect of 3 to 5 months of EBF vs. 0 month.

<sup>§</sup>Corresponds to estimate of  $\beta_{DIR}(t)$  in Figure 1. We estimated the average effect of 3 to 5 months of EBF vs. 0 month.

<sup>&</sup>Corresponds to estimate of  $\beta_{IND}(t)$  in Figure 1. We estimated the average effect of 3 to 5 months of EBF vs. 0 month.

**Supplementary Table 2: Top EWAS hits from ALSPAC data in boys selected at the  $P=1.10^{-4}$  level.**

| CpG site   | Gene                | Chr | Pos.    | Group           | GWAS<br>SNP                      | P      | P <sub>adj</sub> <sup>†</sup> | EBF effect on DNAm<br>(≥3 months vs. 0) <sup>#</sup> |            |            |             | EBF direct effect on BMI<br>(≥3 months vs. 0) <sup>§</sup> |            |            |             | EBF effect on BMI mediated<br>by DNAm<br>(≥3 months vs. 0) <sup>&amp;</sup> |            |            |             |
|------------|---------------------|-----|---------|-----------------|----------------------------------|--------|-------------------------------|------------------------------------------------------|------------|------------|-------------|------------------------------------------------------------|------------|------------|-------------|-----------------------------------------------------------------------------|------------|------------|-------------|
|            |                     |     |         |                 |                                  |        |                               | 1<br>year                                            | 2<br>years | 7<br>years | 15<br>years | 1<br>year                                                  | 2<br>years | 7<br>years | 15<br>years | 1<br>year                                                                   | 2<br>years | 7<br>years | 15<br>years |
| cg26657240 | IL16                | 15  | 81,475  |                 | rs11325<br>Body height           | 3.E-07 | 5.E-06                        | -0.02                                                | -0.02      | -0.03      | -0.03       | -1.43                                                      | -0.39      | -0.01      | -0.06       | -0.01                                                                       | 0.00       | 0.05       | 0.23        |
| cg08651538 | NREP                | 5   | 111,070 | Body            | rs26543<br>BMI                   | 4.E-07 | 7.E-06                        | -0.06                                                | -0.05      | -0.03      | 0.02        | -1.32                                                      | -0.42      | 0.02       | -0.07       | 0.03                                                                        | 0.02       | 0.00       | 0.09        |
| cg26227569 | CPZ/GPR78           | 4   | 8,687   |                 | N                                | 2.E-06 | 8.E-07                        | -0.04                                                | -0.03      | -0.02      | -0.01       | -0.92                                                      | -0.62      | 0.02       | -0.10       | 0.69                                                                        | 0.52       | 0.01       | 0.01        |
| cg10658438 | GP5                 | 3   | 194,117 | 3'UTR           | N                                | 4.E-06 | 4.E-05                        | 0.03                                                 | 0.03       | 0.11       | 0.04        | -0.55                                                      | -0.45      | -0.16      | -0.31       | 0.18                                                                        | 0.13       | 0.02       | 0.04        |
| cg22230229 | BAHCC1              | 17  | 79,372  | TSS1500         | rs68007459<br>Body height        | 5.E-06 | 2.E-05                        | -0.02                                                | -0.02      | 0.00       | 0.02        | -1.36                                                      | -0.43      | -0.08      | -0.09       | 0.07                                                                        | 0.02       | -0.02      | 0.05        |
| cg20559217 | DCPS                | 11  | 126,174 | TSS200          | rs7115672<br>Body height         | 6.E-06 | 3.E-05                        | -0.01                                                | 0.00       | 0.02       | 0.00        | -1.31                                                      | -0.73      | 0.00       | -0.09       | 0.69                                                                        | 0.45       | 0.05       | -0.01       |
| cg18436737 | CTBP1               | 4   | 1,234   | Body            | rs72501962<br>Type 2<br>diabetes | 7.E-06 | 1.E-04                        | 0.19                                                 | 0.12       | -0.05      | 0.01        | -1.51                                                      | -0.71      | 0.08       | -0.17       | -0.04                                                                       | 0.00       | 0.02       | 0.09        |
| cg27149179 | ME3/ PRSS23         | 11  | 86,452  |                 | rs4944571<br>obesity             | 8.E-06 | 2.E-05                        | -0.35                                                | -0.26      | -0.04      | -0.04       | -0.79                                                      | -0.70      | 0.09       | -0.34       | 0.83                                                                        | 0.23       | -0.01      | 0.05        |
| cg01972418 | PAX9                | 14  | 37,125  | TSS1500         | rs10131337<br>Body height        | 9.E-06 | 2.E-05                        | 0.01                                                 | -0.01      | -0.06      | -0.03       | -1.01                                                      | -0.66      | 0.05       | -0.14       | 0.16                                                                        | 0.05       | -0.02      | 0.09        |
| cg15185570 | BARX2               | 11  | 129,488 |                 | N                                | 1.E-05 | 5.E-06                        | -0.02                                                | -0.02      | -0.01      | 0.01        | -0.88                                                      | -0.67      | 0.01       | -0.20       | -0.08                                                                       | -0.02      | 0.03       | -0.01       |
| cg05145608 | FO XK1              | 7   | 4,758   | Body            | N                                | 1.E-05 | 8.E-05                        | -0.06                                                | -0.04      | -0.02      | -0.08       | -0.73                                                      | -0.65      | 0.04       | -0.09       | -0.04                                                                       | -0.08      | -0.01      | -0.03       |
| cg09552166 | MSL2                | 3   | 135,913 | TSS200;<br>Body | rs372030255<br>Body height       | 1.E-05 | 3.E-05                        | 0.08                                                 | 0.08       | 0.08       | 0.01        | -1.01                                                      | -0.53      | 0.02       | -0.05       | -0.77                                                                       | -0.05      | -0.01      | 0.05        |
| cg08079596 | ATOH8               | 2   | 86,000  | Body            | N                                | 1.E-05 | 1.E-04                        | -0.01                                                | -0.03      | -0.04      | -0.02       | -1.31                                                      | -0.78      | 0.14       | 0.01        | -0.01                                                                       | 0.00       | 0.00       | 0.03        |
| cg02640147 | KCNIP1              | 5   | 170,025 | Body            | N                                | 1.E-05 | 3.E-04                        | 0.02                                                 | 0.01       | -0.05      | -0.01       | -1.15                                                      | -0.67      | 0.05       | -0.02       | -0.04                                                                       | -0.02      | 0.00       | 0.07        |
| cg09188763 | LMO1                | 11  | 8,286   | TSS1500         | rs110419<br>Body height          | 1.E-05 | 5.E-05                        | 0.01                                                 | -0.02      | -0.03      | -0.06       | -1.21                                                      | -0.75      | 0.04       | 0.02        | 0.45                                                                        | 0.24       | -0.01      | 0.04        |
| cg07143733 | miR155HG-<br>miR155 | 21  | 26,939  | Body            | N                                | 2.E-05 | 4.E-05                        | -0.20                                                | -0.19      | -0.01      | -0.08       | -1.96                                                      | -0.38      | -0.11      | -0.15       | -0.44                                                                       | -0.18      | -0.05      | 0.05        |
| cg22792674 | VPS72               | 1   | 151,164 | TSS1500         | rs4512652<br>BMI                 | 2.E-05 | 24.E-05                       | 0.00                                                 | 0.00       | 0.00       | 0.00        | -1.39                                                      | -0.82      | 0.03       | -0.10       | 0.01                                                                        | -0.02      | -0.01      | -0.10       |
| cg17765387 | FBXW8               | 12  | 117,355 | Body            | rs12823620<br>Body height        | 2.E-05 | 2.E-05                        | -0.26                                                | -0.19      | -0.03      | -0.07       | -0.34                                                      | -0.17      | 0.02       | -0.25       | -0.15                                                                       | 0.11       | 0.00       | -0.07       |
| cg19865725 | RTN4                | 2   | 55,321  |                 | rs7582359<br>BMI                 | 2.E-05 | 1.E-04                        | -0.07                                                | -0.04      | 0.04       | -0.04       | -0.95                                                      | -0.68      | 0.01       | -0.15       | -0.14                                                                       | -0.04      | -0.02      | -0.17       |
| cg03389890 | ABCD1P4             | 22  | 16,868  |                 | N                                | 2.E-05 | 4.E-05                        | -0.10                                                | -0.04      | 0.04       | 0.03        | -2.19                                                      | -0.99      | 0.06       | -0.03       | 0.11                                                                        | 0.23       | 0.02       | -0.09       |
| cg13915886 | KCNT1               | 9   | 138,637 | Body            | N                                | 2.E-05 | 1.E-04                        | -0.03                                                | -0.03      | -0.01      | -0.04       | -1.27                                                      | 0.09       | -0.13      | -0.08       | 0.40                                                                        | 0.32       | -0.03      | 0.02        |
| cg17945323 | SLC22A8             | 11  | 62,767  | Body            | rs11231299<br>Adipose<br>tissue  | 2.E-05 | 1.E-04                        | 0.03                                                 | 0.02       | -0.04      | 0.01        | -2.35                                                      | -0.40      | -0.10      | -0.19       | 0.33                                                                        | 0.13       | 0.00       | -0.02       |
| cg23864514 | TOMM7/<br>IL6       | 7   | 22,883  |                 | rs112330055<br>Body height       | 2.E-05 | 6.E-05                        | -0.02                                                | -0.03      | -0.02      | -0.02       | -1.04                                                      | -0.38      | -0.07      | -0.10       | 0.11                                                                        | 0.01       | -0.06      | 0.06        |
| cg09187933 | AC079949.3          | 12  | 127,631 |                 | N                                | 2.E-05 | 5.E-05                        | 0.02                                                 | 0.04       | 0.10       | -0.03       | -0.81                                                      | -0.15      | -0.03      | -0.02       | -0.03                                                                       | -0.07      | -0.07      | 0.01        |

|                       |                       |    |         |                  |                                        |        |        |       |       |       |       |       |       |       |       |       |       |       |       |
|-----------------------|-----------------------|----|---------|------------------|----------------------------------------|--------|--------|-------|-------|-------|-------|-------|-------|-------|-------|-------|-------|-------|-------|
| <b>cg21692620</b>     | CCR10/<br>CNTNAP1     | 17 | 42,683  | Body             | rs4792953<br>Body height               | 2.E-05 | 2.E-04 | -0.03 | 0.00  | 0.01  | 0.06  | -1.11 | -0.78 | 0.05  | 0.03  | 4.71  | 1.01  | 0.00  | 0.10  |
| <b>cg23847109</b>     | COL9A2                | 1  | 40,783  | TSS200           | rs1846158<br>Body height               | 2.E-05 | 4.E-04 | 0.25  | 0.14  | -0.05 | -0.05 | -2.25 | -0.72 | -0.24 | -0.33 | -0.88 | -0.46 | 0.00  | 0.02  |
| <b>cg21550785</b>     | ALK                   | 2  | 29,439  | Body             | rs1406230<br>Type 2<br>diabetes        | 2.E-05 | 3.E-04 | 0.41  | 0.30  | -0.01 | -0.02 | -1.12 | -0.40 | 0.00  | -0.09 | -0.01 | 0.00  | -0.01 | -0.03 |
| <b>cg03253268</b>     | CRYAA2                | 21 | 44,593  | 3'UTR            | Rs574083674<br>Waist cir<br>cumference | 2.E-05 | 1.E-05 | 0.05  | 0.02  | -0.05 | 0.03  | -1.22 | -0.47 | 0.01  | -0.02 | -0.83 | -0.54 | -0.01 | -0.26 |
| <b>cg17431280</b>     | ARHGAP35              | 19 | 47,507  | 3'UTR            | N                                      | 2.E-05 | 2.E-04 | -0.12 | -0.10 | -0.08 | 0.06  | -0.92 | -0.36 | 0.04  | -0.18 | -0.02 | -0.01 | 0.00  | 0.01  |
| <b>cg17868723</b>     | FGF14                 | 13 | 102,926 | Body             | rs2607653<br>Type 2<br>diabetes        | 2.E-05 | 7.E-05 | -0.03 | -0.03 | -0.01 | -0.07 | -0.86 | -0.29 | -0.10 | -0.28 | -0.46 | -0.19 | -0.01 | 0.22  |
| <b>cg04781638</b>     | CPEB1                 | 15 | 83,241  | TSS1500;<br>Body | rs150684763<br>Body height             | 2.E-05 | 1.E-06 | 0.00  | -0.01 | -0.01 | -0.01 | -1.21 | -0.36 | -0.04 | -0.01 | -0.30 | -0.11 | 0.03  | 0.17  |
| <b>cg22897141</b>     | MEN1                  | 11 | 64,810  | Body             | rs3782089<br>Body height               | 3.E-05 | 2.E-04 | -0.49 | -0.35 | 0.05  | 0.00  | -0.58 | -0.11 | -0.13 | -0.24 | -0.11 | -0.08 | 0.00  | 0.01  |
| <b>cg04709822</b>     | RPS14                 | 5  | 149,824 | Body             | Rs113681861<br>Waist-hip<br>ratio      | 3.E-05 | 1.E-04 | -0.38 | -0.25 | 0.04  | 0.00  | -0.07 | -0.32 | -0.03 | -0.12 | -1.42 | -0.40 | 0.01  | 0.00  |
| <b>cg25225655</b>     | MSI2                  | 17 | 55,469  | Body             | rs703862<br>Body height                | 3.E-05 | 4.E-04 | 0.14  | 0.09  | -0.02 | -0.03 | -1.04 | -0.40 | -0.02 | -0.22 | -0.35 | -0.11 | -0.04 | 0.07  |
| <b>cg25494075</b>     | NCAM1                 | 11 | 112,752 |                  | rs1816537<br>BMI                       | 3.E-05 | 2.E-04 | -0.31 | -0.22 | -0.02 | 0.00  | -1.06 | -0.51 | 0.10  | -0.05 | -0.09 | -0.23 | -0.04 | 0.16  |
| <b>cg12765567</b>     | miR-7159/<br>miR-1275 | 6  | 33,919  |                  | N                                      | 3.E-05 | 6.E-05 | -0.01 | -0.01 | -0.03 | 0.01  | -1.61 | -0.47 | -0.05 | -0.13 | -0.57 | -0.20 | -0.05 | 0.01  |
| <b>cg27122431</b>     | CDH18                 | 5  | 19,989  | TSS1500          | rs80240198<br>Type 2<br>diabetes       | 3.E-05 | 2.E-04 | -0.09 | -0.07 | 0.06  | 0.13  | -1.46 | -0.38 | -0.18 | -0.33 | 0.11  | 0.09  | -0.03 | 0.03  |
| <b>cg15689991</b>     | RASSF3                | 12 | 65,019  | Body             | N                                      | 3.E-05 | 3.E-04 | 0.03  | 0.02  | -0.03 | -0.05 | -1.64 | -0.73 | -0.03 | 0.06  | -0.01 | 0.02  | -0.02 | -0.01 |
| <b>cg13585930</b>     | NPFFR1                | 10 | 72,027  | TSS1500          | rs4747011<br>Body height               | 4.E-05 | 5.E-05 | -0.06 | 0.00  | 0.03  | 0.00  | -0.92 | -0.58 | 0.04  | -0.23 | -0.41 | -0.16 | 0.02  | 0.07  |
| <b>cg19822851</b>     | NR2C2AP               | 19 | 19,315  | TSS1500          | rs11670016<br>Waist-hip<br>ratio       | 4.E-05 | 2.E-04 | -0.17 | -0.11 | 0.03  | -0.04 | -0.45 | -0.89 | -0.04 | -0.28 | 0.09  | 0.02  | -0.03 | 0.00  |
| <b>cg24924449</b>     | IPO5/RAP2A            | 13 | 98,508  |                  | N                                      | 4.E-05 | 4.E-05 | -0.10 | -0.09 | -0.04 | 0.01  | -0.81 | -0.46 | -0.05 | -0.09 | -0.96 | -0.42 | -0.01 | -0.02 |
| <b>cg17434643</b>     | MIR124-3              | 20 | 61,805  |                  | N                                      | 4.E-05 | 1.E-04 | 0.09  | 0.05  | -0.01 | 0.10  | -1.27 | -0.61 | 0.02  | -0.24 | 0.05  | 0.01  | 0.03  | 0.10  |
| <b>cg19509778</b>     | FOXI2                 | 10 | 129,537 | 3'UTR            | N                                      | 4.E-05 | 9.E-05 | 0.09  | 0.08  | 0.05  | 0.06  | -1.30 | -0.66 | 0.05  | -0.04 | -5.63 | -2.77 | -0.03 | 0.08  |
| <b>cg05694290</b>     | HIP1R                 | 12 | 123,335 | Body             | rs11060344<br>Waist-hip<br>ratio       | 4.E-05 | 4.E-05 | -0.01 | -0.02 | -0.08 | 0.06  | -2.07 | -0.38 | -0.22 | -0.33 | 0.32  | 0.19  | 0.00  | 0.25  |
| <b>cg26938334</b>     | SERPINA1              | 14 | 94,850  | 5'UTR            | rs28929474<br>Body height              | 4.E-05 | 6.E-05 | -0.03 | -0.03 | 0.07  | 0.21  | -1.42 | -0.39 | -0.01 | 0.15  | 0.08  | 0.03  | -0.01 | 0.08  |
| <b>cg22284030</b>     | ARFGAP2               | 11 | 47,186  | 3'UTR            | rs10501320<br>Insulin<br>measurement   | 4.E-05 | 6.E-05 | 0.29  | 0.22  | -0.04 | -0.06 | -1.63 | -1.01 | 0.04  | -0.06 | -0.02 | -0.03 | -0.02 | 0.07  |
| <b>cg13748564</b>     | COL27A1               | 9  | 116,917 | TSS1500          | rs10817582<br>Body height              | 4.E-05 | 4.E-04 | 0.20  | 0.10  | -0.05 | -0.02 | -1.59 | -0.28 | -0.09 | -0.13 | 0.03  | 0.02  | -0.01 | -0.05 |
| <b>ch.15.1141100F</b> | PKM                   | 15 | 72,509  | Body             | Rs181706692<br>Hip circum              | 4.E-05 | 7.E-05 | -0.05 | -0.04 | 0.01  | 0.03  | -0.76 | -0.63 | 0.10  | -0.01 | 0.08  | 0.08  | -0.05 | 0.12  |

|            |                               |    |         |         |                                       |        |        |       |       |       |       |       |       |       |       |       |       |       |       |
|------------|-------------------------------|----|---------|---------|---------------------------------------|--------|--------|-------|-------|-------|-------|-------|-------|-------|-------|-------|-------|-------|-------|
| cg25477843 | PARP10                        | 8  | 145,061 | Body    | ference<br>rs11783655<br>Body height  | 4.E-05 | 2.E-04 | -0.13 | -0.10 | -0.01 | 0.05  | -0.74 | -0.60 | -0.01 | 0.03  | 0.02  | 0.01  | 0.00  | -0.02 |
| cg17395800 | CACNA1F                       | X  | 49,088  | Body    | N                                     | 4.E-05 | 8.E-05 | -0.03 | -0.04 | -0.06 | 0.05  | -0.92 | 0.03  | -0.06 | -0.12 | -0.94 | -0.66 | 0.00  | 0.10  |
| cg15797834 | STAP2                         | 19 | 4,339   | TSS200  | N                                     | 4.E-05 | 1.E-04 | 0.18  | 0.13  | 0.02  | 0.10  | -1.71 | -0.77 | 0.05  | 0.00  | -0.01 | 0.00  | -0.02 | -0.01 |
| cg08443605 | RARB                          | 3  | 24,872  |         | N                                     | 5.E-05 | 2.E-04 | 0.07  | 0.04  | -0.01 | -0.01 | -1.49 | -0.55 | -0.08 | -0.09 | 2.46  | 0.71  | 0.01  | 0.00  |
| cg05475524 | ACTN3                         | 11 | 66,327  | Body    | rs679228<br>Body height               | 5.E-05 | 4.E-04 | 0.04  | 0.02  | 0.03  | -0.03 | -0.47 | -0.34 | -0.16 | -0.21 | 0.60  | 0.18  | 0.00  | 0.04  |
| cg22464447 | IQGAP1/CRTC3                  | 15 | 91,054  |         | rs11609<br>Body height                | 5.E-05 | 4.E-04 | 0.00  | 0.00  | -0.02 | -0.03 | -1.16 | -0.55 | -0.02 | -0.20 | 0.18  | 0.12  | 0.00  | -0.13 |
| cg03569876 | CSNK1A1/<br>miR143-<br>miR145 | 5  | 148,908 | Body    | rs368510<br>Body height               | 5.E-05 | 2.E-04 | -0.32 | -0.22 | 0.04  | -0.03 | 0.41  | 0.17  | 0.04  | -0.17 | -0.02 | 0.06  | 0.00  | -0.04 |
| cg19842091 | RASGEF1C                      | 5  | 179,567 | 5'UTR   | rs4290977<br>Body height              | 5.E-05 | 5.E-05 | 0.03  | 0.03  | 0.07  | 0.02  | -1.13 | -0.59 | -0.11 | -0.12 | 0.35  | 0.05  | 0.00  | 0.01  |
| cg06483432 | KIT                           | 4  | 55,523  | TSS1500 | rs11727273<br>BMI                     | 5.E-05 | 2.E-04 | -0.33 | -0.24 | -0.01 | 0.09  | -0.79 | -0.40 | -0.03 | -0.16 | -0.17 | 0.00  | -0.03 | 0.00  |
| cg25507226 | DNAJB6                        | 7  | 157,191 | Body    | rs1182436<br>Type 2<br>diabetes       | 5.E-05 | 3.E-04 | -0.10 | -0.07 | -0.01 | 0.02  | -1.09 | -0.64 | -0.01 | -0.01 | -0.45 | -0.22 | 0.00  | 0.16  |
| cg17141902 | NINJ1                         | 9  | 95,897  | TSS1500 | rs13810828<br>Body height             | 6.E-05 | 2.E-05 | 0.03  | 0.02  | -0.02 | -0.05 | -2.50 | -0.60 | -0.27 | -0.30 | -0.09 | -0.04 | 0.01  | -0.02 |
| cg10222361 | USP31                         | 16 | 23,071  |         | N                                     | 6.E-05 | 5.E-04 | -0.10 | -0.06 | 0.03  | -0.06 | -1.08 | -0.72 | 0.01  | 0.03  | -0.04 | -0.02 | -0.05 | 0.03  |
| cg26479868 | TMTC1                         | 12 | 29,916  | Body    | rs188945888<br>Hip circum<br>ference  | 6.E-05 | 2.E-04 | -0.12 | -0.10 | -0.05 | -0.06 | -0.78 | -1.11 | 0.04  | -0.15 | -0.02 | 0.01  | -0.05 | -0.20 |
| cg05738687 | RFLNB                         | 17 | 290     | 3'UTR   | rs77612020<br>Waist circum<br>ference | 6.E-05 | 9.E-05 | -0.07 | -0.05 | 0.02  | 0.17  | -1.73 | -0.63 | -0.08 | -0.18 | 0.00  | 0.02  | 0.00  | 0.03  |
| cg25591451 | TRIM4                         | 7  | 99,518  | TSS1500 | rs11973801<br>BMI                     | 6.E-05 | 1.E-04 | 0.05  | 0.06  | 0.18  | -0.05 | -1.16 | -0.78 | -0.06 | -0.17 | -0.14 | 0.02  | 0.00  | 0.05  |
| cg25104430 | ALKBH1                        | 14 | 78,128  |         | N                                     | 6.E-05 | 1.E-04 | -0.15 | -0.12 | -0.04 | -0.09 | -0.92 | -0.51 | 0.14  | 0.02  | -0.02 | -0.02 | 0.00  | 0.05  |
| cg05895666 | SLC25A43                      | X  | 118,533 | TSS1500 | rs3848873<br>Body height              | 6.E-05 | 2.E-04 | -0.07 | -0.04 | 0.04  | 0.01  | -1.01 | -0.63 | -0.08 | -0.06 | 0.27  | 0.45  | -0.04 | 0.00  |
| cg26507353 | MAP3K8/LYZL2                  | 10 | 30,843  |         | N                                     | 7.E-05 | 4.E-04 | 0.04  | 0.03  | 0.02  | 0.05  | -1.46 | -0.08 | -0.06 | -0.12 | -0.33 | -0.18 | 0.03  | 0.16  |
| cg03048432 | NIN                           | 14 | 51,291  | 5'UTR   | N                                     | 7.E-05 | 2.E-04 | 0.30  | 0.21  | -0.01 | 0.00  | -0.80 | -0.58 | 0.03  | -0.06 | -0.95 | -0.31 | 0.02  | 0.12  |
| cg12394014 | MORF4L1                       | 15 | 79,172  | Body    | N                                     | 7.E-05 | 7.E-04 | 0.04  | 0.02  | 0.00  | -0.02 | -0.73 | -0.67 | 0.10  | 0.03  | 0.13  | 0.10  | -0.02 | -0.02 |
| cg13478737 | FIBCD1                        | 9  | 133,807 | Body    | rs3739514<br>BMI                      | 8.E-05 | 2.E-04 | 0.88  | 0.64  | 0.02  | -0.13 | -0.56 | 0.11  | -0.01 | -0.33 | 0.05  | 0.02  | -0.04 | 0.01  |
| cg07798347 | RAP1GAP                       | 1  | 21,918  |         | Rs55722102<br>Body height             | 8.E-05 | 6.E-05 | 0.22  | 0.14  | -0.02 | 0.10  | -1.30 | -0.51 | -0.06 | -0.29 | -1.20 | -0.36 | 0.00  | 0.05  |
| cg17929273 | LGALS2                        | 22 | 37,968  | Body    | N                                     | 8.E-05 | 3.E-04 | -0.12 | -0.09 | 0.03  | -0.05 | -1.65 | -0.53 | -0.12 | -0.18 | 0.10  | 0.00  | 0.02  | 0.17  |
| cg09469566 | SOX1                          | 13 | 112,717 |         | N                                     | 8.E-05 | 7.E-04 | 0.02  | 0.01  | -0.02 | -0.01 | -1.13 | -0.85 | 0.05  | -0.03 | -0.02 | -0.01 | 0.00  | -0.07 |
| cg15661389 | GAS7                          | 17 | 10,019  | Body    | rs2320549<br>Body height              | 8.E-05 | 2.E-04 | -0.23 | -0.17 | 0.02  | -0.02 | 0.03  | -0.46 | -0.12 | -0.38 | -0.16 | -0.06 | -0.02 | 0.12  |
| cg01381374 | GNGT1                         | 7  | 93,474  |         | rs2528531<br>BMI                      | 8.E-05 | 1.E-04 | -0.05 | -0.03 | 0.04  | -0.07 | -1.18 | -0.47 | -0.14 | -0.16 | 1.01  | 0.30  | 0.00  | 0.01  |
| cg10614809 | COBL                          | 7  | 51,539  |         | rs11765748<br>BMI                     | 8.E-05 | 3.E-04 | -0.17 | -0.16 | -0.02 | -0.03 | -1.08 | -0.70 | 0.08  | 0.10  | 0.15  | 0.05  | 0.00  | 0.00  |
| cg07951931 | GALNT9                        | 12 | 132,886 | Body    | rs11247009                            | 8.E-05 | 8.E-05 | -0.40 | -0.30 | -0.02 | -0.01 | -1.42 | -0.99 | 0.06  | -0.05 | -0.29 | -0.25 | 0.00  | 0.02  |

|                   |                 |    |         |                   |                                  |        |        |       |       |       |       |       |       |       |       |       |       |       |       |
|-------------------|-----------------|----|---------|-------------------|----------------------------------|--------|--------|-------|-------|-------|-------|-------|-------|-------|-------|-------|-------|-------|-------|
| <b>cg01919939</b> | DPH6            | 15 | 35,990  |                   | BMI<br>rs7181610<br>BMI          | 8.E-05 | 2.E-04 | -0.27 | -0.19 | -0.01 | -0.08 | -0.63 | -1.03 | 0.01  | -0.09 | 3.06  | 1.29  | 0.01  | 0.00  |
| <b>cg13882795</b> | NRARP           | 9  | 140,195 | 1stExon;<br>3'UTR | N                                | 8.E-05 | 9.E-05 | 0.18  | 0.14  | 0.11  | 0.09  | -0.68 | -0.59 | 0.07  | -0.02 | -0.01 | 0.07  | -0.01 | 0.07  |
| <b>cg15661753</b> | TUBA1C          | 12 | 49,627  |                   | N                                | 8.E-05 | 4.E-04 | -0.17 | -0.13 | 0.00  | -0.02 | -1.02 | -0.31 | -0.07 | -0.09 | -1.38 | -0.54 | 0.01  | 0.00  |
| <b>cg20276677</b> | NPSR1           | 7  | 34,698  | TSS200            | rs73310815<br>Obesity            | 9.E-05 | 2.E-04 | -0.29 | -0.18 | 0.05  | 0.02  | -0.61 | -0.81 | -0.02 | -0.19 | -0.29 | -0.16 | 0.01  | 0.01  |
| <b>cg18335290</b> | LIMS2           | 2  | 128,439 | 1stExon;<br>5'UTR | rs73954691<br>Type 2<br>diabetes | 9.E-05 | 4.E-04 | 0.05  | 0.03  | 0.03  | -0.04 | -0.87 | -0.12 | -0.02 | -0.13 | 0.14  | 0.05  | 0.00  | 0.05  |
| <b>cg17566334</b> | PACRG           | 6  | 163,515 | Body              | N                                | 9.E-05 | 9.E-05 | 0.00  | 0.00  | -0.01 | 0.03  | -1.36 | -0.54 | 0.09  | -0.09 | 0.00  | -0.01 | -0.03 | -0.14 |
| <b>cg11704631</b> | RUNX1           | 21 | 36,396  | Body              | Rs4507181<br>Waist-hip<br>ratio  | 9.E-05 | 4.E-04 | -0.19 | -0.14 | 0.07  | 0.03  | -1.03 | -0.63 | 0.00  | -0.13 | -0.13 | 0.00  | -0.05 | 0.06  |
| <b>cg07341022</b> | FOXD4L1         | 2  | 114,269 |                   | N                                | 9.E-05 | 4.E-04 | -0.01 | -0.01 | -0.05 | -0.13 | -1.01 | -0.74 | 0.06  | -0.02 | -0.34 | -0.23 | 0.01  | -0.07 |
| <b>cg02129885</b> | ID1/<br>miR3193 | 20 | 30,218  |                   | N                                | 1.E-04 | 2.E-04 | 0.23  | 0.15  | -0.06 | 0.06  | -2.13 | -0.90 | 0.00  | -0.15 | -0.13 | -0.10 | -0.01 | 0.03  |
| <b>cg02324580</b> | SRCAP           | 16 | 30,751  | Body              | rs4402589<br>BMI                 | 1.E-04 | 2.E-03 | 0.08  | 0.07  | 0.09  | -0.12 | -1.08 | -0.50 | -0.05 | -0.13 | -0.17 | -0.09 | 0.00  | 0.12  |
| <b>cg01260615</b> | ZNF184          | 6  | 27,485  |                   | N                                | 1.E-04 | 2.E-04 | -0.13 | -0.11 | -0.02 | -0.05 | -1.25 | -0.57 | 0.07  | -0.02 | 0.18  | 0.11  | 0.01  | -0.09 |
| <b>cg01877937</b> | L3MBTL          | 20 | 42,143  | TSS1500           | N                                | 1.E-04 | 3.E-04 | 0.18  | 0.11  | 0.02  | -0.02 | -1.19 | -0.64 | 0.02  | 0.00  | 0.11  | -0.03 | 0.00  | 0.01  |

<sup>†</sup>*P* values adjusted for obesity-related polygenic risk score

<sup>#</sup>Corresponds to estimate of  $\beta_M(t)$  in Figure 1. We estimated the average effect of 3 to 5 months of EBF vs. 0 month.

<sup>§</sup>Corresponds to estimate of  $\beta_{DIR}(t)$  in Figure 1. We estimated the average effect of 3 to 5 months of EBF vs. 0 month.

<sup>&</sup>Corresponds to estimate of  $\beta_{IND}(t)$  in Figure 1. We estimated the average effect of 3 to 5 months of EBF vs. 0 month.



**Supplementary Table 3.** CpG sites selected in multi-mediator analyses based on forward selection. The P-value to enter the model is  $10^{-4}$  and to stay in the model  $10^{-3}$ .

| Girls      |        |                       | Boys       |                     |                       |
|------------|--------|-----------------------|------------|---------------------|-----------------------|
| CpG site   | Gene   | P-value <sup>#</sup>  | CpG site   | Gene                | P-value <sup>#</sup>  |
| cg06471491 | miR-21 | $<10^{-16}$           | cg26657240 | IL16                | $<10^{-16}$           |
| cg16645539 | SNAPC3 | $5.6 \times 10^{-16}$ | cg08651538 | NREP                | $6.1 \times 10^{-10}$ |
| cg04126095 | MASP1  | $2.5 \times 10^{-14}$ | cg20559217 | DCPS                | $1.3 \times 10^{-9}$  |
| cg10082165 | CTSG   | $6.6 \times 10^{-10}$ | cg07951931 | GALNT9              | $1.7 \times 10^{-9}$  |
| cg26872564 | ZNF185 | $1.2 \times 10^{-8}$  | cg26227569 | CPZ/GPR78           | $9.4 \times 10^{-8}$  |
| cg00524694 | PROP1  | $2.3 \times 10^{-7}$  | cg01972418 | PAX9                | $1.7 \times 10^{-7}$  |
| cg26992566 | EMC8   | $3.1 \times 10^{-7}$  | cg07143733 | miR155HG-<br>miR155 | $9.0 \times 10^{-7}$  |
| cg17401282 | GABRG2 | $5.0 \times 10^{-7}$  | cg19509778 | FOXI2               | $1.4 \times 10^{-6}$  |
| cg07603794 | CLASP1 | $1.6 \times 10^{-4}$  | cg22230229 | BAHCC1              | $8.0 \times 10^{-6}$  |
| cg17901584 | DHCR24 | $2.7 \times 10^{-4}$  | cg23847109 | COL9A2              | $3.2 \times 10^{-5}$  |
| cg11746359 | MAML3  | $6.4 \times 10^{-4}$  | cg19822851 | NR2C2AP             | $1.5 \times 10^{-4}$  |
| cg07012178 | PRKAG2 | $9.2 \times 10^{-4}$  |            |                     |                       |
| cg03103888 | TMCO3  | $9.7 \times 10^{-4}$  |            |                     |                       |

<sup>#</sup>P-value in the final model.

**Supplementary Table 4.** Functional annotation clustering with DAVID, significant terms at the 5% level

| Category     | Term                                                                 | Number of Genes | P-value            |
|--------------|----------------------------------------------------------------------|-----------------|--------------------|
| <b>Girls</b> |                                                                      |                 |                    |
| KEGG_PATHWAY | AMPK signaling pathway                                               | 4               | 0.034              |
| KEGG_PATHWAY | Insulin signaling pathway                                            | 4               | 0.046              |
| KEGG_PATHWAY | Endocytosis                                                          | 5               | 0.050              |
| GOTERM       | ATP binding                                                          | 14              | 0.019              |
| GOTERM       | Multicellular organism development                                   | 7               | 0.049              |
| <b>Boys</b>  |                                                                      |                 |                    |
| KEGG_PATHWAY | Pathways in cancer                                                   | 7               | 0.025              |
| GOTERM       | Negative regulation of transcription, DNA-templated                  | 10              | 1E10 <sup>-4</sup> |
| GOTERM       | Positive regulation of tyrosine phosphorylation of Stat3 protein     | 3               | 0.020              |
| GOTERM       | Negative regulation of transcription from RNA polymerase II promoter | 9               | 0.031              |
| GOTERM       | Regulation of cell shape                                             | 4               | 0.035              |
| GOTERM       | Hemopoiesis                                                          | 3               | 0.036              |

**Supplementary Table 5:** Top miRNAs associated with child longitudinal BMI from ALSPAC data in boys and girls selected at the  $P=1.10^{-4}$  level.

| CpG site     | miRNA                 | Chr | Pos.<br>(kb) | Breast<br>Milk <sup>†</sup> | P      | EBF effect on DNAm<br>(≥3 months vs. 0) <sup>#</sup> |            |            |             | EBF direct effect on BMI<br>(≥3 months vs. 0) <sup>§</sup> |            |            |             | EBF effect on BMI<br>mediated by DNAm<br>(≥3 months vs. 0) <sup>&amp;</sup> |            |            |             |
|--------------|-----------------------|-----|--------------|-----------------------------|--------|------------------------------------------------------|------------|------------|-------------|------------------------------------------------------------|------------|------------|-------------|-----------------------------------------------------------------------------|------------|------------|-------------|
|              |                       |     |              |                             |        | 1<br>year                                            | 2<br>years | 7<br>years | 15<br>years | 1<br>year                                                  | 2<br>years | 7<br>years | 15<br>years | 1<br>year                                                                   | 2<br>years | 7<br>years | 15<br>years |
| <b>Girls</b> |                       |     |              |                             |        |                                                      |            |            |             |                                                            |            |            |             |                                                                             |            |            |             |
| cg06471491   | miR-21                | 17  | 57,918       | Yes                         | <E-16  | 0.02                                                 | -0.08      | -0.07      | -0.07       | -1.13                                                      | -0.51      | -0.17      | -0.37       | 0.36                                                                        | 0.11       | 0.00       | 0.01        |
| cg05241732   | 1Kb from<br>miR-208a  | 14  | 23,859       | No                          | 3.E-06 | -0.20                                                | -0.12      | 0.03       | 0.00        | -0.28                                                      | -0.22      | -0.26      | -0.39       | -0.04                                                                       | -0.02      | -0.01      | 0.01        |
| cg06527213   | 1Kb from<br>miR-1276  | 15  | 86,315       | Yes                         | 4.E-05 | -0.04                                                | -0.03      | -0.05      | -0.05       | -0.92                                                      | -1.03      | -0.22      | -0.31       | -0.13                                                                       | -0.03      | -0.02      | -0.09       |
| cg22941668   | miR-145               | 5   | 148,810      | Yes                         | 9.E-05 | -0.03                                                | -0.01      | 0.02       | 0.02        | -0.46                                                      | -0.16      | -0.25      | -0.47       | 0.02                                                                        | 0.08       | 0.02       | -0.20       |
| <b>Boys</b>  |                       |     |              |                             |        |                                                      |            |            |             |                                                            |            |            |             |                                                                             |            |            |             |
| cg07143733   | miR-155HG             | 21  | 26,939       | Yes                         | 2.E-05 | -0.20                                                | -0.19      | -0.01      | -0.08       | -1.96                                                      | -0.38      | -0.11      | -0.15       | -0.44                                                                       | -0.18      | -0.05      | 0.05        |
| cg12765567   | 2Kb from<br>miR-7159  | 6   | 33,919       | No                          | 3.E-05 | -0.01                                                | -0.01      | -0.03      | 0.01        | -1.61                                                      | -0.47      | -0.05      | -0.13       | -0.57                                                                       | -0.20      | -0.05      | 0.01        |
| cg17434643   | 4Kb from<br>miR-124-3 | 20  | 61,805       | Yes                         | 4.E-05 | 0.09                                                 | 0.05       | -0.01      | 0.10        | -1.27                                                      | -0.61      | 0.02       | -0.24       | 0.05                                                                        | 0.01       | 0.03       | 0.10        |
| cg22941668   | miR-145               | 5   | 148,810      | Yes                         | 5.E-05 | -0.32                                                | -0.22      | 0.04       | -0.03       | 0.41                                                       | 0.17       | 0.04       | -0.17       | -0.02                                                                       | 0.06       | 0.00       | -0.04       |

<sup>†</sup>Expressed in breast milk according to database liqDB

<sup>#</sup>Corresponds to estimate of  $\beta_M(t)$  in Figure 1. We estimated the average effect of 3 to 5 months of EBF vs. 0 month.

<sup>§</sup>Corresponds to estimate of  $\beta_{DIR}(t)$  in Figure 1. We estimated the average effect of 3 to 5 months of EBF vs. 0 month.

<sup>&</sup>Corresponds to estimate of  $\beta_{IND}(t)$  in Figure 1. We estimated the average effect of 3 to 5 months of EBF vs. 0 month.

**Supplementary Table 6: mQTL analysis for the top EWAS hits based on the mQTLdb database<sup>37</sup>**

| CpG site       | Gene                  | Chr | Pos.<br>(kb) | mQTL       | SNP<br>Chr | SNP<br>position | Cis/Trans | Epoch                       |
|----------------|-----------------------|-----|--------------|------------|------------|-----------------|-----------|-----------------------------|
| <b>Girls</b>   |                       |     |              |            |            |                 |           |                             |
| cg06471491     | miR-21                | 17  | 57,918       | rs4742392  | 9          | 789             | Trans     | Childhood                   |
| cg16645539     | SNAPC3                | 9   | 15,423       | -          | -          | -               | -         | -                           |
| cg07408552     | ATP6V0A1              | 17  | 40,612       | Multiple   | 6          | 29,918-31,457   | Trans     | Birth/Childhood/Adolescence |
| cg08224066     | DHX15/<br>PPARGC1A    | 4   | 24,578       | -          | -          | -               | -         | -                           |
| cg14822546     | LINC00398/<br>ALOX5AP | 13  | 31,381       | -          | -          | -               | -         | -                           |
| cg14776321     | FAM238C               | 10  | 27,220       | -          | -          | -               | -         | -                           |
| ch.8.18261148F | NATP/NAT2             | 8   | 18,217       | -          | -          | -               | -         | -                           |
| cg00313685     | CUX1                  | 7   | 101,469      | Multiple   | 7          | 101,460-101,498 | Cis       | Childhood/Adolescence       |
| cg17476951     | TRAPPC9               | 8   | 141,054      | Multiple   | 8          | 141,047         | Cis       | Birth                       |
| -              | -                     | -   | -            | Multiple   | 11         | 38,646-38,984   | Trans     | Adolescence                 |
| -              | -                     | -   | -            | Multiple   | 1          | 47,129-47,178   | Trans     | Adolescence                 |
| -              | -                     | -   | -            | Multiple   | 8          | 141046- 141047  | Cis       | Birth                       |
| cg26398656     | OSBPL1A               | 18  | 21,852       | Multiple   | 16         | 79563- 79568    | Trans     | Childhood                   |
| -              | -                     | -   | -            | rs34918972 | 18         | 21896           | Cis       | Adolescence                 |
| -              | -                     | -   | -            | Multiple   | 8          | 76716- 77199    | Trans     | Birth                       |
| -              | -                     | -   | -            | Multiple   | 15         | 97556- 79569    | Trans     | Birth                       |
| cg26872564     | ZNF185                | X   | 152,087      | Multiple   | X          | 152059-152105   | Cis       | Birth/Childhood/Adolescence |
| cg18176842     | FAM84A                | 2   | 14,776       | Multiple   | 9          | 131985- 131982  | Trans     | Birth                       |
| cg04354689     | PDPK1                 | 16  | 2,660        | -          | -          | -               | -         | -                           |
| <b>Boys</b>    |                       |     |              |            |            |                 |           |                             |
| cg26657240     | IL16                  | 15  | 81,475       | Multiple   | 15         | 81465- 81667    | Cis       | Childhood/Adolescence       |
| cg08651538     | NREP                  | 5   | 111,070      | -          | -          | -               | -         | -                           |

**Supplementary Table 7: Distribution of the main epidemiological variables in Gen3G**

|                                                                                  | <b>Boys</b> | <b>Girls</b> |
|----------------------------------------------------------------------------------|-------------|--------------|
|                                                                                  | N=104       | N=89         |
| <b>Duration of exclusive breastfeeding (EXBF) (in months)</b>                    |             |              |
| 0                                                                                | 22 (21.2%)  | 22 (24.7%)   |
| 1                                                                                | 15 (14.4%)  | 3 (3.4%)     |
| 2                                                                                | 11 (10.6%)  | 7 (7.9%)     |
| 3                                                                                | 6 (5.8%)    | 6 (6.7%)     |
| 4                                                                                | 15 (14.4%)  | 12 (13.5%)   |
| ≥5                                                                               | 35 (33.7%)  | 39 (43.8%)   |
| <b>Mother's Education</b>                                                        |             |              |
| Lower than college                                                               | 24 (24.1%)  | 25 (28.1%)   |
| College or higher                                                                | 80 (76.9%)  | 64 (71.9%)   |
| <b>Mother's ever smoking status</b>                                              |             |              |
| No                                                                               | 97 (93.3%)  | 83 (93.3%)   |
| Yes                                                                              | 7 (6.7%)    | 6 (6.7%)     |
| <b>Child BMI at birth (in kg/m<sup>2</sup>)</b>                                  |             |              |
| Mean (±SD)                                                                       | 13.0 (±1.1) | 13.1 (±1.1)  |
| <b>Mother's BMI (1<sup>st</sup> semester of pregnancy) (in kg/m<sup>2</sup>)</b> |             |              |
| Mean (±SD)                                                                       | 26.1 (±6.6) | 24.9 (±4.9)  |
| <b>Gestational age (in weeks)</b>                                                |             |              |
| Mean (±SD)                                                                       | 39.6 (1.1)  | 39.5 (1.1)   |
| <b>Ethnic group</b>                                                              |             |              |
| Caucasians                                                                       | 101 (97.1%) | 85 (95.5%)   |
| Non-Caucasians                                                                   | 3 (2.9%)    | 4 (4.5%)     |

**Supplementary Table 8:** Replication of top EWAS hits associated with child longitudinal BMI in Gen3G data at 5 years of age (at the  $P=2.9 \times 10^{-4}$  level)

| CpG site          | Gene      | Chr | Pos.<br>(kb) | <i>P</i> -value      | EBF effect on<br>DNAm<br>( $\geq 3$ months vs. 0) | EBF direct effect<br>on BMI<br>( $\geq 3$ months vs. 0) | EBF effect on BMI<br>mediated by DNAm<br>( $\geq 3$ months vs. 0) |
|-------------------|-----------|-----|--------------|----------------------|---------------------------------------------------|---------------------------------------------------------|-------------------------------------------------------------------|
| <b>Girls</b>      |           |     |              |                      |                                                   |                                                         |                                                                   |
| <b>cg22879191</b> | CUX1      | 7   | 101,469      | <8E-05               | -0.033                                            | -0.57                                                   | 0.03                                                              |
| <b>cg19769982</b> | miR-155HG | 21  | 26,934       | $1.7 \times 10^{-4}$ | -0.003                                            | 0.24                                                    | -0.001                                                            |

## Extended data figures

**Extended data Fig.1. Mediation model for the association between exclusive breastfeeding (EBF) and child BMI from birth to 18 years of age.**  $EXP(t)$  represents the estimate of EBF duration on DNAm at age  $t$ .  $NIE(t)$  represents the indirect effect of EBF duration on child BMI at age  $t$  mediated by DNAm (see Methods section).  $NDE(t)$  represents the direct effect of EBF on child BMI at age  $t$  not mediated by DNAm.  $TOT(t)$  represents the total effect of EBF on child BMI at age  $t$  (i.e., direct + indirect effects). The top CpG sites were selected based on the  $M(t)*E(t)$  interaction effect on  $y(t)$ , that is the overall interaction effect on child BMI from birth to 18 years.

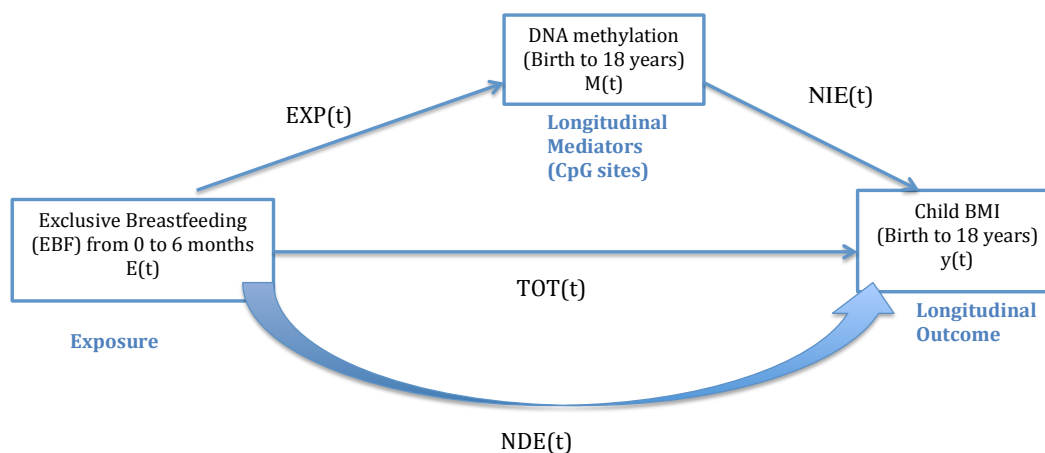

**Extended data Fig.2. Genomic landscape of the EWAS-significant CpG site cg06471491 in *miR-21* discovered in ALSPAC.**

The *H3K4Me1*, *H3K27Ac* and *H3K4Me3* tracks show histone modifications, suggestive of regulatory activities. The DNase hypersensitivity track shows regions hypersensitive to cutting by the DNase enzyme. Regulatory regions are generally DNase sensitive. Transcription factor (TF) binding track displays regions of TF (proteins responsible for modulating gene transcription) binding. The DNA regulatory elements track displays the chromatin states, where different colors represent different annotations. Bright red predicted promoter region including TSS; The CpG tracks display the methylation status of specific CpGs in blood cell line and embryonic stem cell line, respectively, where the methylation status is color coded. Orange is methylated; purple is partially methylated; blue is unmethylated.

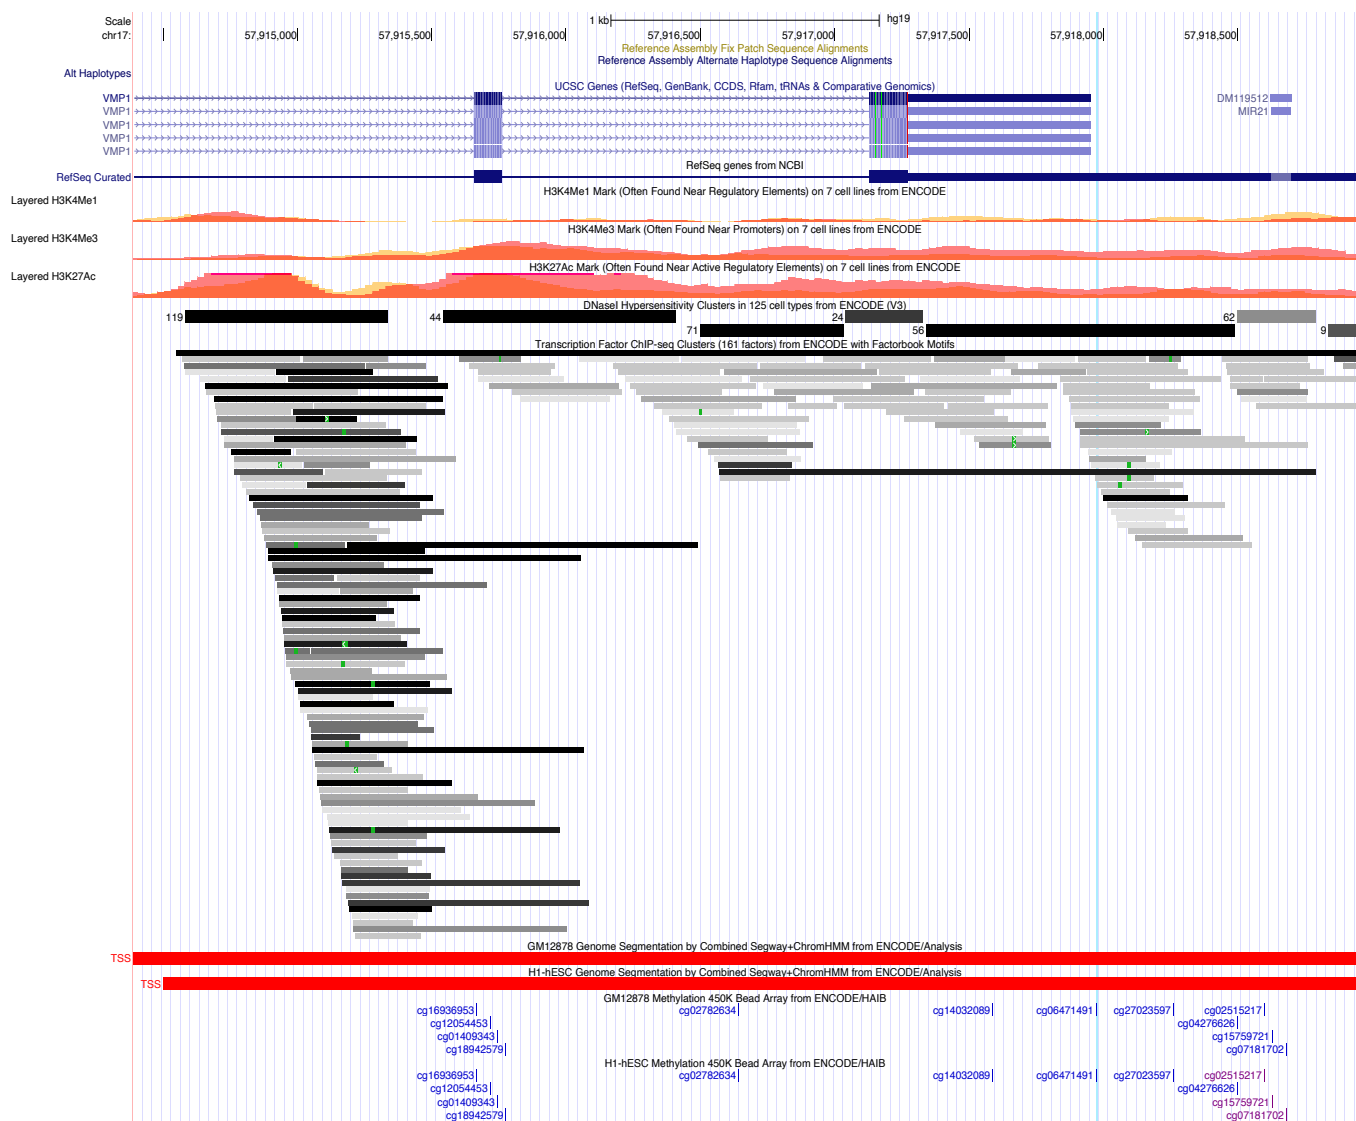



**Extended data Fig.3. Genomic landscape of the EWAS-significant CpG site cg07143733 discovered in ALSPAC and cg19769982 found in GEN3G in *miR-155HG*.**

The *H3K4Me1*, *H3K27Ac* and *H3K4Me3* tracks show histone modifications, suggestive of regulatory activities. The DNase hypersensitivity track shows regions hypersensitive to cutting by the DNase enzyme. Regulatory regions are generally DNase sensitive. Transcription factor (TF) binding track displays regions of TF (proteins responsible for modulating gene transcription) binding. The DNA regulatory elements track displays the chromatin states, where different colors represent different annotations. Bright red predicted promoter region including TSS; Orange predicted enhancer; blue predicted CTCF (CCCTC-binding factor) enriched element; gray predicted repressed or low activity region; Green predicted a transcribed region. The two CpG tracks display the methylation status of specific CpG in blood cell line and embryonic stem cell line, respectively, where the methylation status is color coded. Orange is methylated; purple is partially methylated; blue is unmethylated.

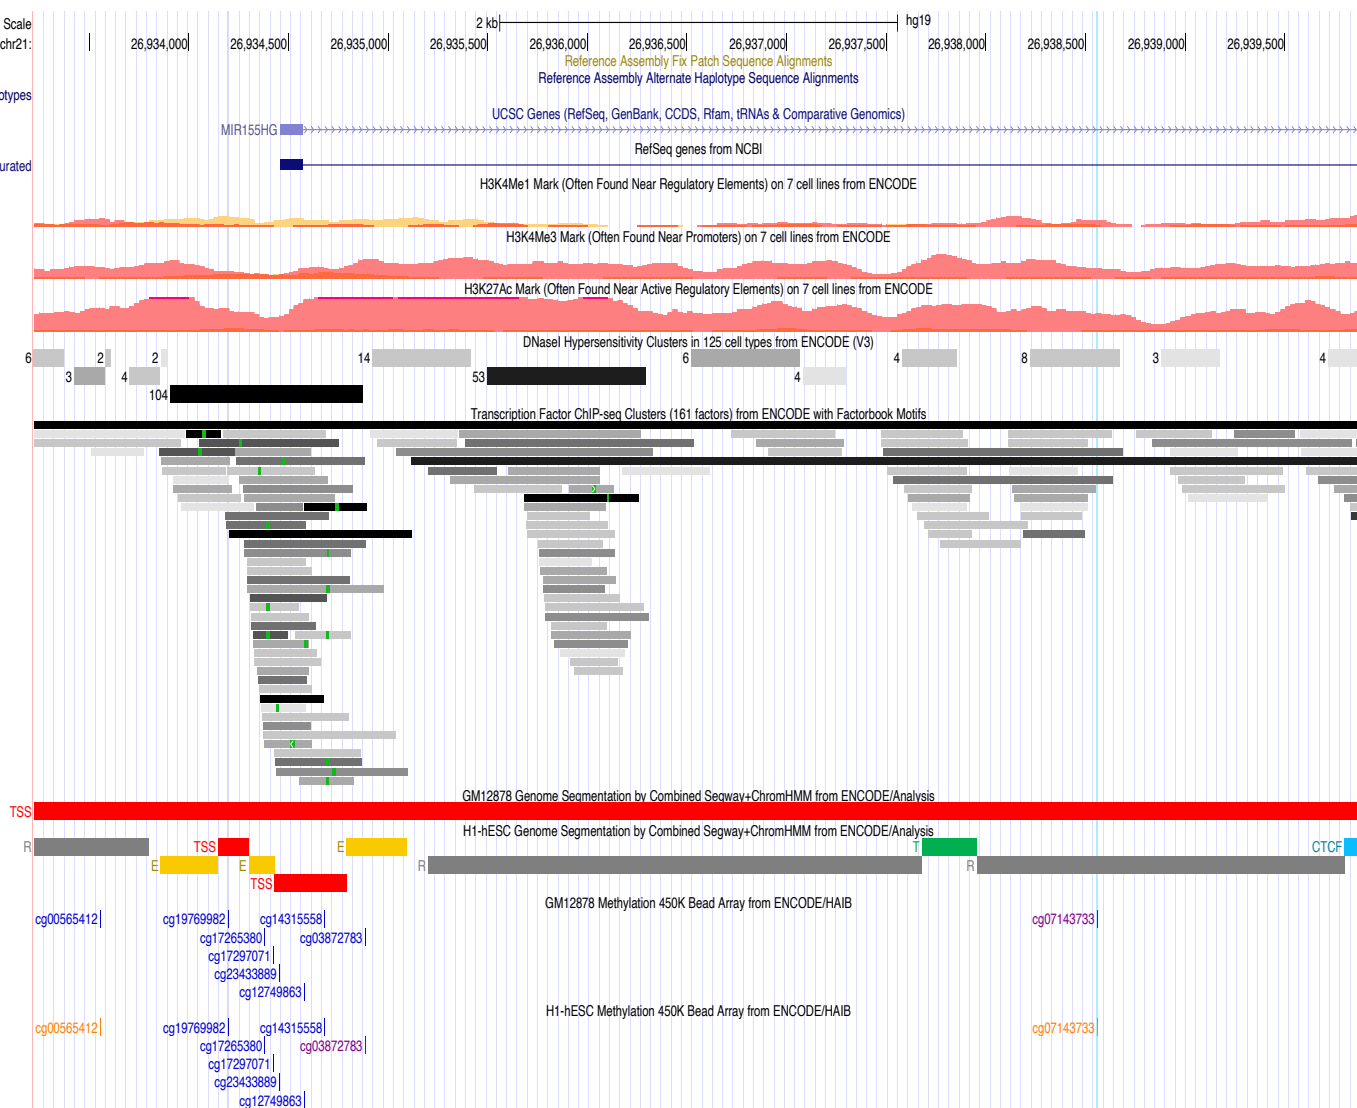

**Extended data Fig.4. Gene-gene and gene-miRNA networks built from CpG sites mediating the association between EBF and child BMI.** (The red nodes correspond to genes and blue nodes to miRNAs discovered in our analysis. The grey nodes correspond to other known miRNAs not discovered in our analysis).

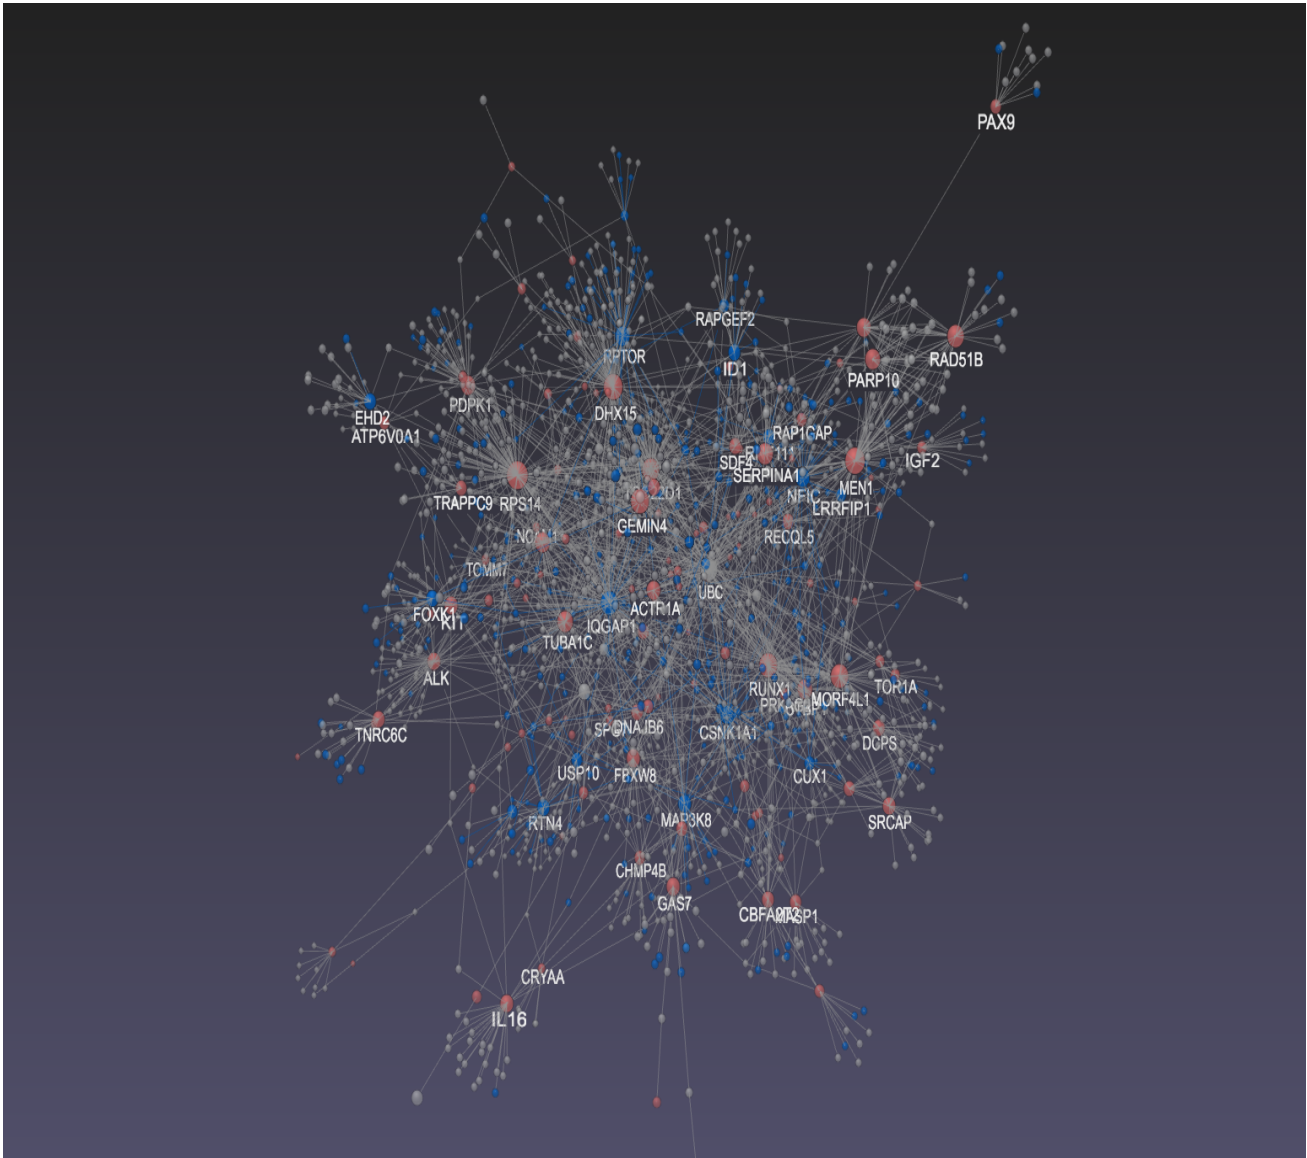

**Extended data Fig.5. Change in BMI mediated by DNA methylation from the combined effect of multiple CpG sites where DNA methylation is induced by different durations (3,4 and 5 months vs. no breastfeeding) of exclusive breastfeeding (EBF) in ALSPAC girls and boys, at different ages from birth to 17 years, and after adjustment for BMI-related polygenic risk score. The CpG sites in the final multi-mediator model were selected by forward selection (see Methods). Each curve represents a smooth estimate function (loess estimate) of BMI changes over time and the confidence bands are the 95% confidence intervals of the smoothed curve.**

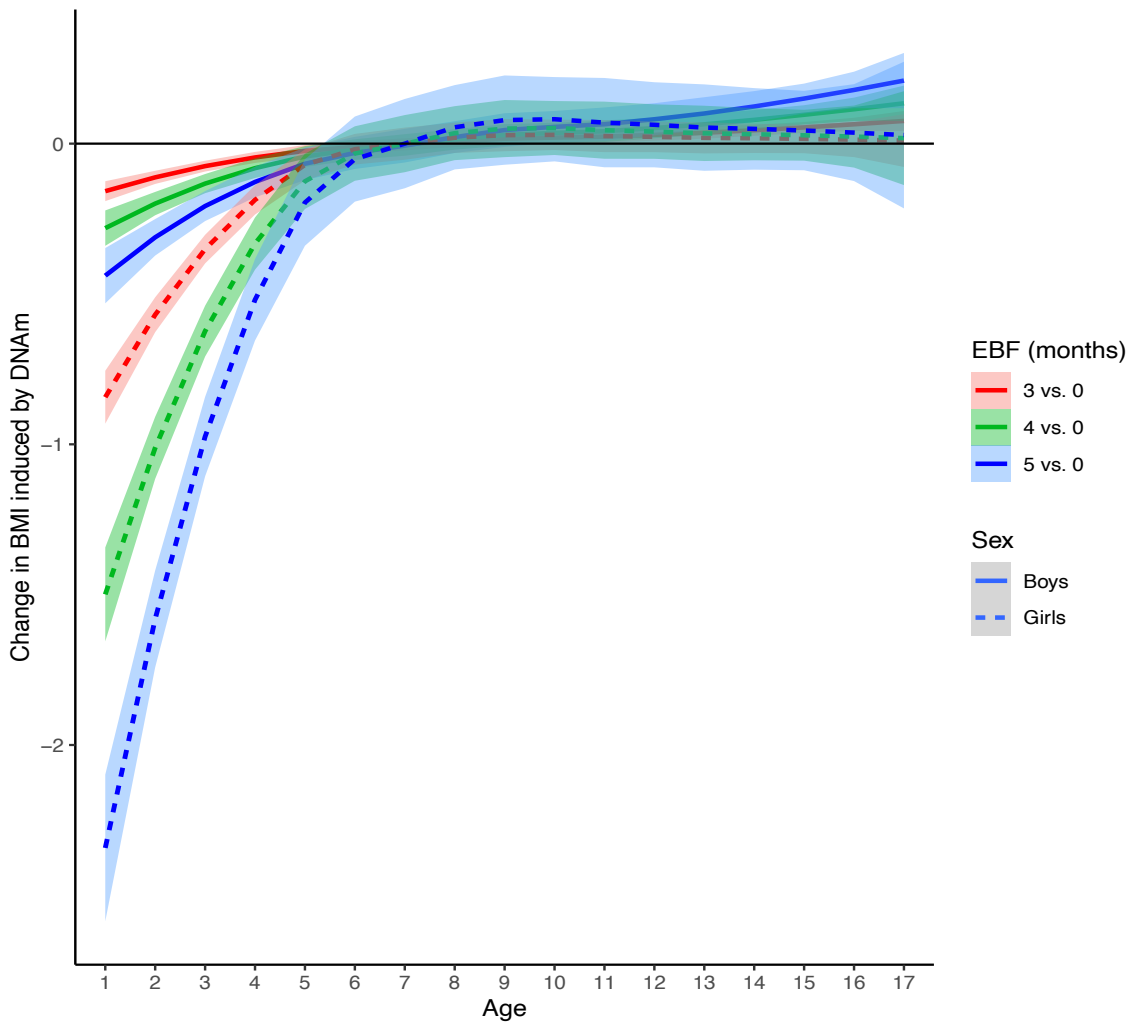

**Extended data Fig.6. QQ plots of our test statistic to detect significant CpG sites after adjustment for genomic controls in ALSPAC girls (a) and boys (b).** Each plot displays the sample quantiles (y-axis) vs. the theoretical quantiles of a  $\chi^2(4)$  distribution (x-axis).

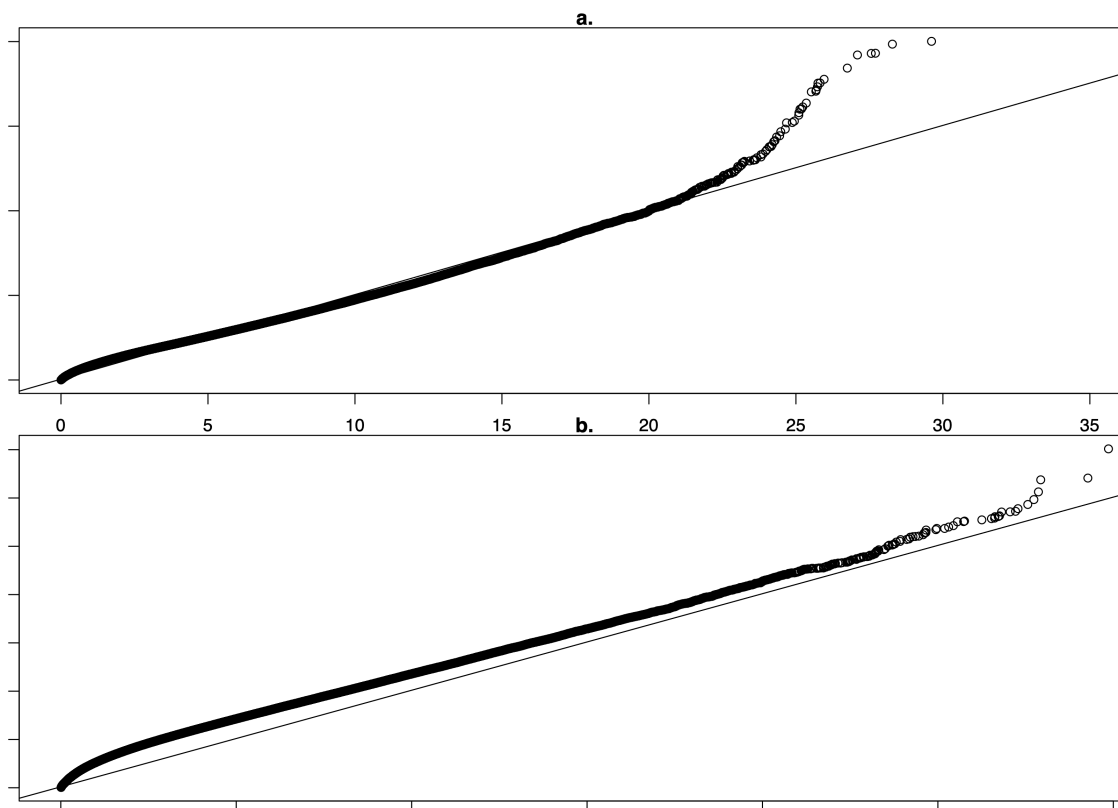

Supplement: 13148_2021_1209_MOESM1_ESM.pdf [file 13148_2021_1209_MOESM1_ESM.pdf]
